# Supplementary material
Source: PubMed Central journal article supplement (PMC3622519)
Supplement: NIHMS14112-supplement-01.pdf [file NIHMS14112-supplement-01.pdf]

**Supporting Information for**  
**Mapping of the Auto-Inhibitory Interactions of Protein Kinase R by Nuclear Magnetic**  
**Resonance**

by  
Vladimir Gelev<sup>1†</sup>, Husseyin Aktas<sup>2</sup>, Assen Marintchev<sup>1</sup>, Takuhiro Ito<sup>1</sup>, Dominique Frueh<sup>1</sup>,  
Michael Hemond<sup>1</sup>, David Rovnyak<sup>4</sup>, Miriam Debus<sup>2</sup>, Sven Hyberts<sup>1</sup>, Anny Usheva<sup>3</sup>, Jose  
Halperin<sup>2</sup> and Gerhard Wagner<sup>1\*</sup>

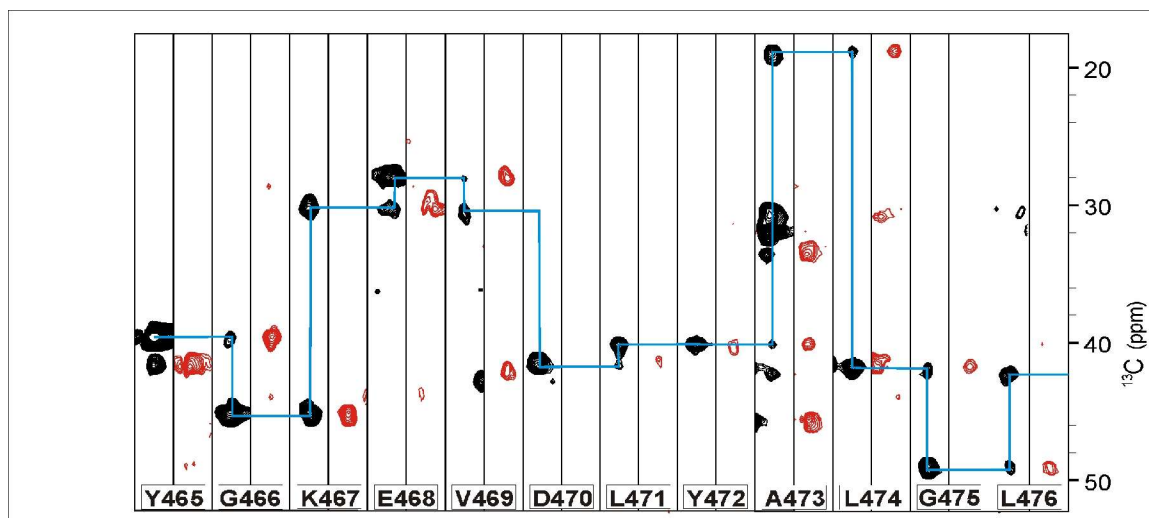

**Figure 1\_SI.** 2D strips from the non-linear Trosy-HNCACB (black) and Trosy-HNCOCACB (red) spectra of the K296R kinase domain (residues 252-551, 250 $\mu$ M in 50 mM sodium phosphate, 25 mM ammonium sulfate, pH 6.70). Sequential connectivities are shown in blue.

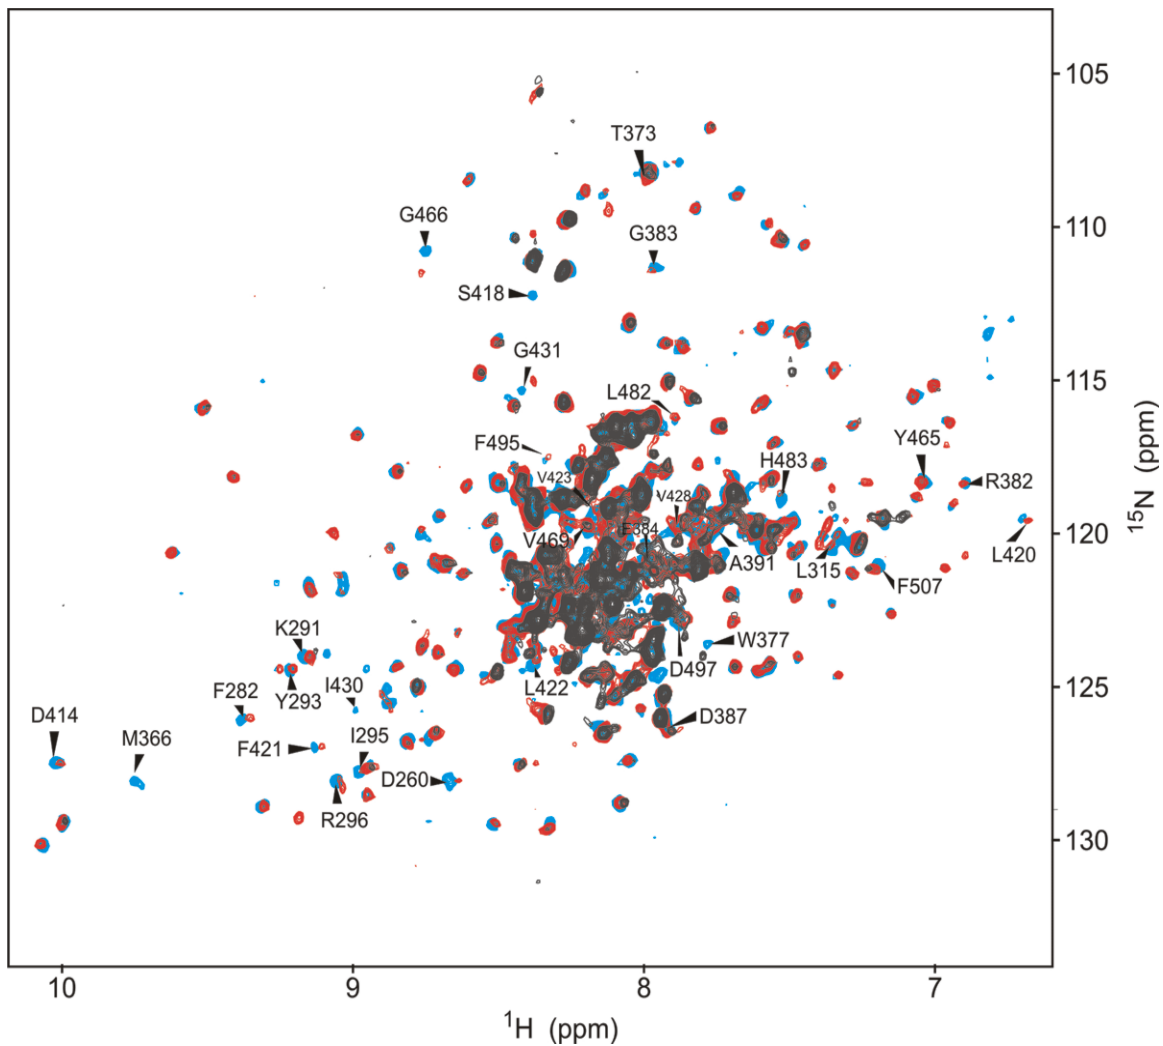

**Figure 2\_SI.**  $^{15}\text{N}$ -HSQC spectrum of the kinase domain (K296R) alone (50  $\mu\text{M}$ , blue trace) and in the presence of 0.2 mM (red) and 0.6 mM (black) RBD (1-178). Amide residues that display the most significant changes are labeled;

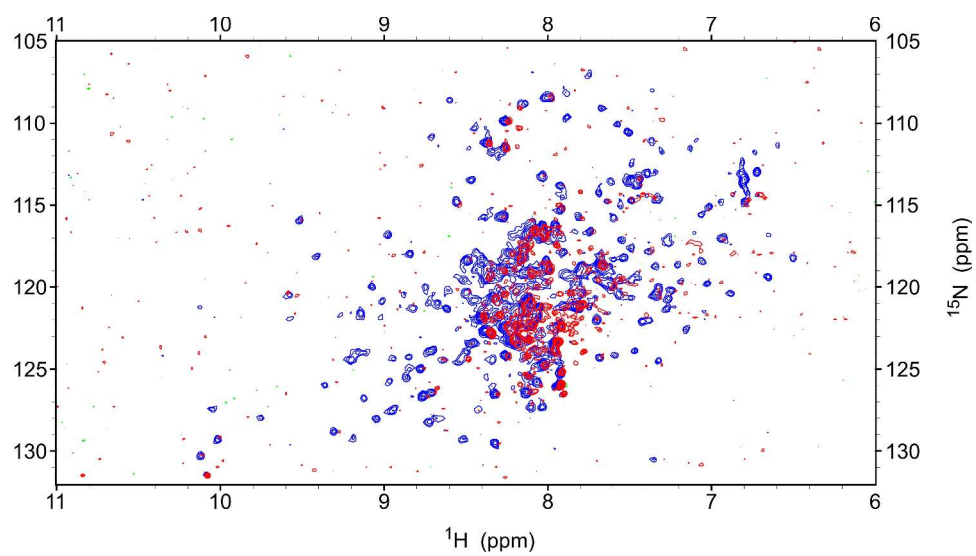

**Figure 3\_SI.**  $^{15}\text{N}$ -HSQC spectrum of the H483D/K296R kinase alone (blue) and in the presence of 5-fold excess RBD (1-178) (red).

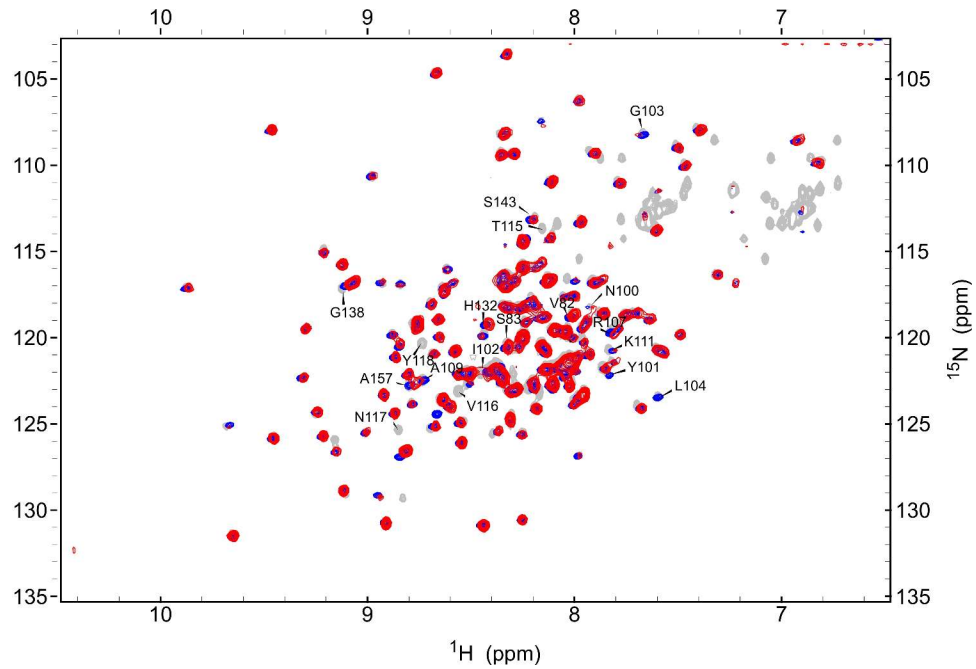

**Figure 4\_SI.** <sup>15</sup>N-HSQC spectrum of the mutant N117R full-length dsRNA binding domain, RBD (1-178) alone (blue trace) and in the presence of two-fold excess KD (K296R 252-551, red). The spectrum of the wild-type RBD is shown in gray.

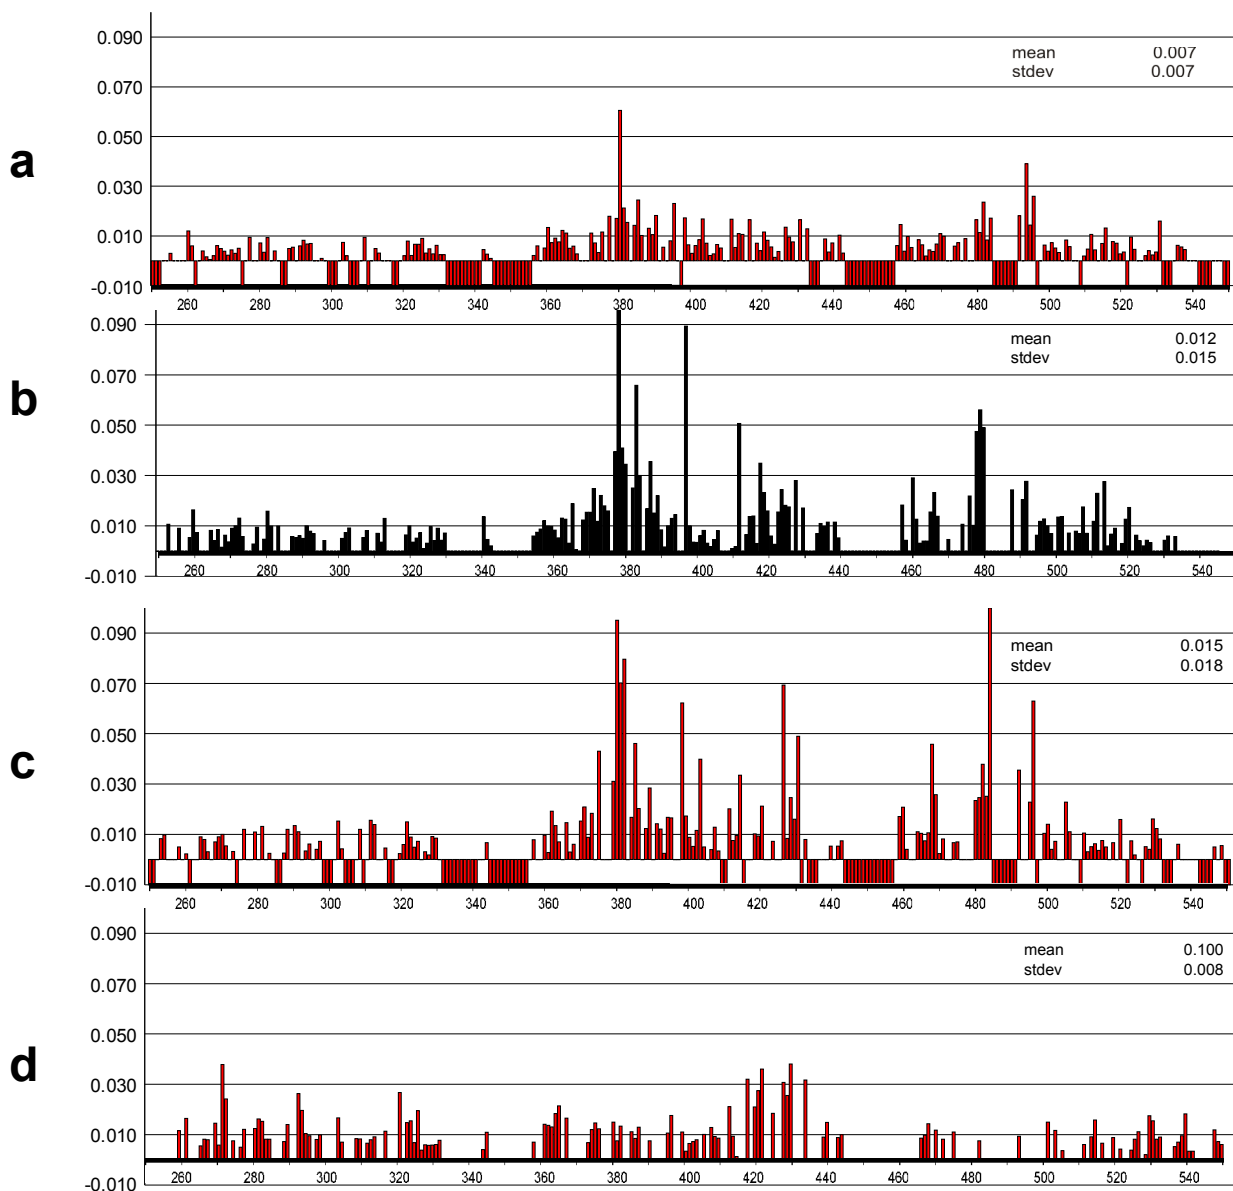

**Figure 5\_SI.** Chemical shift perturbation data for the PKR kinase domain (251-551). Peaks that have been assigned but whose shift can not be determined due to overlap are omitted. Unassigned residues are shown as negative values in a) and c); a) Changes in 0.1 mM K296R KD upon addition of 2-fold excess RBD2 (97-178); b) changes in K296R KD upon addition of 7-fold excess RBD2 (97-178); c) changes in the K296R KD upon addition of 3-fold excess RBD1+2 (1-178); d) changes in the K296R/F495A mutant KD upon addition of 5-fold excess RBD1+2 (1-178).

**Table 1\_SI.** NMR assignments of the PKR kinase domain (M252-C551, K296R) backbone. The data was collected in 20 mM Na phosphate buffer, pH 6.70 at 25° C and referenced to DSS. The amide chemical shifts are from TROSY data and uncorrected. CO chemical shifts are from HNC0 spectra and are shown as the 'CO-1' resonance for the n+1 amino acid.

| Group | Atom | Nuc | Shift   | SDev  | Assignments |
|-------|------|-----|---------|-------|-------------|
| T4    | CA   | 13C | 61.525  | 0.000 | 1           |
| T4    | CA-1 | 13C | 56.647  | 0.000 | 1           |
| T4    | CB   | 13C | 69.675  | 0.000 | 1           |
| T4    | CB-1 | 13C | 29.596  | 0.000 | 1           |
| T4    | CO-1 | 13C | 177.249 | 0.000 | 1           |
| T4    | H    | 1H  | 7.463   | 0.007 | 10          |
| T4    | N    | 15N | 113.497 | 0.050 | 8           |
| K5    | CA   | 13C | 56.722  | 0.000 | 1           |
| K5    | CA-1 | 13C | 61.434  | 0.000 | 1           |
| K5    | CB   | 13C | 32.412  | 0.000 | 1           |
| K5    | CB-1 | 13C | 69.686  | 0.000 | 1           |
| K5    | CO-1 | 13C | 174.460 | 0.000 | 1           |
| K5    | H    | 1H  | 8.097   | 0.005 | 10          |
| K5    | N    | 15N | 125.008 | 0.087 | 8           |
| Y6    | CA   | 13C | 59.221  | 0.000 | 1           |
| Y6    | CA-1 | 13C | 56.689  | 0.000 | 1           |
| Y6    | CB   | 13C | 40.056  | 0.000 | 1           |
| Y6    | CB-1 | 13C | 32.379  | 0.000 | 1           |
| Y6    | CO-1 | 13C | 177.130 | 0.000 | 1           |
| Y6    | H    | 1H  | 8.454   | 0.008 | 12          |
| Y6    | N    | 15N | 118.018 | 0.070 | 9           |
| T7    | CA   | 13C | 59.031  | 0.000 | 1           |
| T7    | CA-1 | 13C | 59.192  | 0.000 | 1           |
| T7    | CB   | 13C | 69.988  | 0.000 | 1           |
| T7    | CB-1 | 13C | 40.079  | 0.000 | 1           |
| T7    | CO-1 | 13C | 176.064 | 0.000 | 1           |
| T7    | H    | 1H  | 7.440   | 0.015 | 8           |
| T7    | N    | 15N | 113.695 | 0.125 | 7           |
| V8    | CB   | 13C | 31.444  | 0.000 | 1           |
| V8    | CB-1 | 13C | 69.996  | 0.000 | 1           |
| V8    | CO-1 | 13C | 172.600 | 0.000 | 1           |
| V8    | H    | 1H  | 9.167   | 0.009 | 10          |
| V8    | N    | 15N | 122.097 | 0.053 | 7           |
| D9    | CA   | 13C | 55.493  | 0.000 | 1           |
| D9    | CB   | 13C | 44.231  | 0.000 | 1           |
| D9    | CB-1 | 13C | 31.319  | 0.000 | 1           |
| D9    | CO-1 | 13C | 177.048 | 0.000 | 1           |
| D9    | H    | 1H  | 8.669   | 0.009 | 9           |
| D9    | N    | 15N | 128.099 | 0.073 | 7           |
| K10   | CA   | 13C | 59.247  | 0.000 | 1           |
| K10   | CA-1 | 13C | 55.505  | 0.000 | 1           |
| K10   | CB   | 13C | 31.883  | 0.000 | 1           |
| K10   | CB-1 | 13C | 44.224  | 0.000 | 1           |
| K10   | CO-1 | 13C | 178.612 | 0.000 | 1           |
| K10   | H    | 1H  | 8.342   | 0.015 | 13          |
| K10   | N    | 15N | 129.615 | 0.094 | 9           |
| R11   | CA   | 13C | 59.131  | 0.000 | 1           |
| R11   | CA-1 | 13C | 59.330  | 0.000 | 1           |
| R11   | CB   | 13C | 28.152  | 0.000 | 1           |
| R11   | CB-1 | 13C | 31.814  | 0.000 | 1           |
| R11   | CO-1 | 13C | 178.354 | 0.000 | 1           |

|     |      |     |         |       |    |
|-----|------|-----|---------|-------|----|
| R11 | H    | 1H  | 7.953   | 0.014 | 15 |
| R11 | N    | 15N | 121.228 | 0.141 | 10 |
| F12 | CA   | 13C | 57.420  | 0.000 | 1  |
| F12 | CA-1 | 13C | 59.358  | 0.000 | 1  |
| F12 | CB   | 13C | 37.524  | 0.000 | 1  |
| F12 | CB-1 | 13C | 28.243  | 0.000 | 1  |
| F12 | CO-1 | 13C | 178.522 | 0.000 | 1  |
| F12 | H    | 1H  | 9.286   | 0.006 | 18 |
| F12 | N    | 15N | 121.682 | 0.120 | 12 |
| G13 | CA   | 13C | 46.106  | 0.007 | 2  |
| G13 | CA-1 | 13C | 57.247  | 0.000 | 1  |
| G13 | H    | 1H  | 7.352   | 0.006 | 13 |
| G13 | N    | 15N | 98.572  | 0.117 | 6  |
| M14 | CA   | 13C | 57.102  | 0.000 | 1  |
| M14 | CA-1 | 13C | 46.116  | 0.000 | 1  |
| M14 | CB   | 13C | 32.897  | 0.000 | 1  |
| M14 | CB-1 | 13C | 45.961  | 0.000 | 1  |
| M14 | CO-1 | 13C | 178.350 | 0.000 | 1  |
| M14 | H    | 1H  | 7.685   | 0.007 | 14 |
| M14 | N    | 15N | 118.867 | 0.045 | 10 |
| D15 | CA   | 13C | 55.294  | 0.000 | 1  |
| D15 | CA-1 | 13C | 56.872  | 0.000 | 1  |
| D15 | CB   | 13C | 41.533  | 0.000 | 1  |
| D15 | CB-1 | 13C | 32.979  | 0.000 | 1  |
| D15 | CO-1 | 13C | 178.779 | 0.000 | 1  |
| D15 | H    | 1H  | 8.036   | 0.008 | 14 |
| D15 | N    | 15N | 118.442 | 0.054 | 10 |
| F16 | C    | 13C | 175.642 | 0.000 | 0  |
| F16 | CA   | 13C | 56.854  | 0.009 | 2  |
| F16 | CA-1 | 13C | 55.326  | 0.000 | 1  |
| F16 | CB   | 13C | 41.245  | 0.094 | 2  |
| F16 | CB-1 | 13C | 41.406  | 0.000 | 1  |
| F16 | CO-1 | 13C | 175.642 | 0.000 | 1  |
| F16 | H    | 1H  | 7.563   | 0.014 | 11 |
| F16 | N    | 15N | 117.046 | 0.052 | 9  |
| K17 | C    | 13C | 173.800 | 0.000 | 0  |
| K17 | CA   | 13C | 53.523  | 0.050 | 2  |
| K17 | CB   | 13C | 35.668  | 0.018 | 2  |
| K17 | CO-1 | 13C | 173.800 | 0.000 | 1  |
| K17 | H    | 1H  | 9.429   | 0.005 | 10 |
| K17 | N    | 15N | 118.250 | 0.076 | 8  |
| E18 | C    | 13C | 174.024 | 0.000 | 0  |
| E18 | CA   | 13C | 56.743  | 0.060 | 2  |
| E18 | CB   | 13C | 26.435  | 0.050 | 2  |
| E18 | CO-1 | 13C | 174.024 | 0.000 | 1  |
| E18 | H    | 1H  | 8.844   | 0.005 | 10 |
| E18 | N    | 15N | 118.021 | 0.119 | 8  |
| I19 | C    | 13C | 175.364 | 0.000 | 0  |
| I19 | CA   | 13C | 63.046  | 0.061 | 2  |
| I19 | CB   | 13C | 38.024  | 0.130 | 2  |
| I19 | CO-1 | 13C | 175.364 | 0.000 | 1  |
| I19 | H    | 1H  | 7.801   | 0.009 | 10 |
| I19 | N    | 15N | 118.769 | 0.043 | 8  |
| E20 | C    | 13C | 177.598 | 0.000 | 0  |
| E20 | CA   | 13C | 54.609  | 0.003 | 2  |
| E20 | CB   | 13C | 33.456  | 0.014 | 2  |
| E20 | CO-1 | 13C | 177.598 | 0.000 | 1  |
| E20 | H    | 1H  | 9.331   | 0.014 | 10 |
| E20 | N    | 15N | 128.979 | 0.116 | 8  |
| L21 | C    | 13C | 175.402 | 0.000 | 0  |
| L21 | CA   | 13C | 55.560  | 0.000 | 1  |
| L21 | CB   | 13C | 41.604  | 0.000 | 1  |
| L21 | CO-1 | 13C | 175.402 | 0.000 | 1  |
| L21 | H    | 1H  | 8.048   | 0.013 | 8  |

|      |      |     |         |       |    |
|------|------|-----|---------|-------|----|
| L21  | N    | 15N | 127.333 | 0.104 | 7  |
| I22  | CA   | 13C | 61.361  | 0.000 | 1  |
| I22  | CA-1 | 13C | 55.658  | 0.000 | 1  |
| I22  | CB   | 13C | 38.942  | 0.000 | 1  |
| I22  | CB-1 | 13C | 41.701  | 0.000 | 1  |
| I22  | CO-1 | 13C | 177.129 | 0.000 | 1  |
| I22  | H    | 1H  | 8.955   | 0.006 | 11 |
| I22  | N    | 15N | 124.528 | 0.103 | 8  |
| G23  | CA   | 13C | 45.873  | 0.068 | 4  |
| G23  | CA-1 | 13C | 61.465  | 0.000 | 1  |
| G23  | CB-1 | 13C | 38.798  | 0.000 | 1  |
| G23  | CO-1 | 13C | 176.851 | 0.000 | 1  |
| G23  | H    | 1H  | 7.591   | 0.008 | 12 |
| G23  | N    | 15N | 109.958 | 0.093 | 9  |
| S24  | C    | 13C | 171.794 | 0.000 | 0  |
| S24  | CA   | 13C | 57.328  | 0.035 | 2  |
| S24  | CB   | 13C | 64.469  | 0.046 | 2  |
| S24  | CO-1 | 13C | 171.794 | 0.000 | 1  |
| S24  | H    | 1H  | 8.270   | 0.007 | 8  |
| S24  | N    | 15N | 115.709 | 0.028 | 7  |
| S24  | ca   | 13C | 57.230  | 0.000 | 0  |
| G25  | C    | 13C | 173.997 | 0.000 | 0  |
| G25  | CA   | 13C | 45.381  | 0.112 | 2  |
| G25  | CO-1 | 13C | 173.997 | 0.000 | 1  |
| G25  | H    | 1H  | 8.064   | 0.013 | 12 |
| G25  | N    | 15N | 113.093 | 0.081 | 9  |
| G26  | CA   | 13C | 46.602  | 0.000 | 1  |
| F27  | C    | 13C | 174.341 | 0.000 | 0  |
| F27  | CA   | 13C | 55.945  | 0.051 | 2  |
| F27  | CA-1 | 13C | 46.666  | 0.000 | 1  |
| F27  | CB   | 13C | 38.400  | 0.025 | 2  |
| F27  | CO-1 | 13C | 174.341 | 0.000 | 1  |
| F27  | H    | 1H  | 7.719   | 0.009 | 10 |
| F27  | N    | 15N | 118.245 | 0.129 | 8  |
| G28  | C    | 13C | 175.411 | 0.000 | 0  |
| G28  | CA   | 13C | 44.977  | 0.046 | 4  |
| G28  | CO-1 | 13C | 175.411 | 0.000 | 1  |
| G28  | H    | 1H  | 7.553   | 0.014 | 13 |
| G28  | N    | 15N | 110.527 | 0.091 | 10 |
| Q29  | C    | 13C | 174.828 | 0.000 | 0  |
| Q29  | CA   | 13C | 55.816  | 0.011 | 2  |
| Q29  | CB   | 13C | 33.518  | 0.000 | 1  |
| Q29  | CO-1 | 13C | 173.281 | 0.000 | 1  |
| Q29  | H    | 1H  | 8.082   | 0.005 | 8  |
| Q29  | N    | 15N | 119.183 | 0.099 | 7  |
| V30  | C    | 13C | 174.541 | 0.000 | 0  |
| V30  | CA   | 13C | 61.451  | 0.049 | 2  |
| V30  | CB   | 13C | 33.424  | 0.027 | 2  |
| V30  | CO-1 | 13C | 174.541 | 0.000 | 1  |
| V30  | H    | 1H  | 8.319   | 0.005 | 7  |
| V30  | N    | 15N | 121.795 | 0.086 | 6  |
| V30? | H    | 1H  | 8.319   | 0.002 | 3  |
| V30? | N    | 15N | 121.751 | 0.055 | 2  |
| F31  | C    | 13C | 173.911 | 0.000 | 0  |
| F31  | CA   | 13C | 56.079  | 0.012 | 2  |
| F31  | CB   | 13C | 42.680  | 0.055 | 2  |
| F31  | CO-1 | 13C | 173.911 | 0.000 | 1  |
| F31  | H    | 1H  | 9.377   | 0.008 | 11 |
| F31  | N    | 15N | 125.919 | 0.097 | 9  |
| K32  | C    | 13C | 175.534 | 0.000 | 0  |
| K32  | CA   | 13C | 54.688  | 0.082 | 2  |
| K32  | CB   | 13C | 35.266  | 0.095 | 2  |
| K32  | CO-1 | 13C | 175.534 | 0.000 | 1  |
| K32  | H    | 1H  | 9.159   | 0.007 | 10 |



|     |      |     |         |       |    |
|-----|------|-----|---------|-------|----|
| K32 | N    | 15N | 121.648 | 0.105 | 8  |
| A33 | C    | 13C | 175.043 | 0.000 | 0  |
| A33 | CA   | 13C | 51.559  | 0.011 | 2  |
| A33 | CB   | 13C | 24.099  | 0.082 | 2  |
| A33 | CO-1 | 13C | 175.043 | 0.000 | 1  |
| A33 | H    | 1H  | 8.724   | 0.006 | 8  |
| A33 | N    | 15N | 123.899 | 0.100 | 7  |
| K34 | CA   | 13C | 54.527  | 0.077 | 2  |
| K34 | CB   | 13C | 34.410  | 0.139 | 2  |
| K34 | CO-1 | 13C | 174.977 | 0.000 | 1  |
| K34 | H    | 1H  | 8.688   | 0.009 | 13 |
| K34 | N    | 15N | 121.013 | 0.101 | 9  |
| H35 | CA   | 13C | 58.468  | 0.000 | 1  |
| H35 | CB   | 13C | 31.880  | 0.000 | 1  |
| H35 | CO-1 | 13C | 176.603 | 0.000 | 1  |
| H35 | H    | 1H  | 9.202   | 0.008 | 12 |
| H35 | N    | 15N | 129.255 | 0.128 | 9  |
| H35 | C    | 13C | 176.603 | 0.000 | 0  |
| H35 | CA   | 13C | 58.468  | 0.000 | 0  |
| H35 | CB   | 13C | 31.880  | 0.000 | 0  |
| H35 | H    | 1H  | 9.203   | 0.000 | 0  |
| H35 | N    | 15N | 129.255 | 0.000 | 0  |
| R36 | CA   | 13C | 59.587  | 0.000 | 1  |
| R36 | CA-1 | 13C | 58.515  | 0.000 | 1  |
| R36 | CB   | 13C | 29.715  | 0.000 | 1  |
| R36 | CB-1 | 13C | 31.908  | 0.000 | 1  |
| R36 | CO-1 | 13C | 178.784 | 0.000 | 1  |
| R36 | H    | 1H  | 8.148   | 0.004 | 13 |
| R36 | N    | 15N | 126.404 | 0.098 | 10 |
| G39 | CA   | 13C | 46.426  | 0.051 | 2  |
| G39 | CA-1 | 13C | 54.138  | 0.000 | 1  |
| G39 | CB-1 | 13C | 40.549  | 0.000 | 1  |
| G39 | CO-1 | 13C | 178.985 | 0.000 | 1  |
| G39 | H    | 1H  | 7.690   | 0.003 | 11 |
| G39 | N    | 15N | 109.019 | 0.119 | 9  |
| K40 | CA   | 13C | 56.189  | 0.066 | 2  |
| K40 | CA-1 | 13C | 46.364  | 0.152 | 2  |
| K40 | CB   | 13C | 32.153  | 0.000 | 1  |
| K40 | CO-1 | 13C | 174.685 | 0.000 | 1  |
| K40 | H    | 1H  | 9.181   | 0.016 | 11 |
| K40 | N    | 15N | 124.008 | 0.103 | 9  |
| T41 | CA   | 13C | 62.570  | 0.031 | 2  |
| T41 | CB   | 13C | 69.238  | 0.046 | 2  |
| T41 | CB-1 | 13C | 32.087  | 0.000 | 1  |
| T41 | CO-1 | 13C | 175.604 | 0.000 | 1  |
| T41 | H    | 1H  | 8.149   | 0.006 | 8  |
| T41 | N    | 15N | 118.092 | 0.099 | 7  |
| Y42 | CA   | 13C | 57.829  | 0.012 | 2  |
| Y42 | CB   | 13C | 42.773  | 0.037 | 2  |
| Y42 | CO-1 | 13C | 173.193 | 0.000 | 1  |
| Y42 | H    | 1H  | 9.224   | 0.006 | 10 |
| Y42 | N    | 15N | 124.447 | 0.088 | 9  |
| V43 | CA   | 13C | 61.120  | 0.019 | 2  |
| V43 | CB   | 13C | 33.194  | 0.068 | 2  |
| V43 | CO-1 | 13C | 174.574 | 0.000 | 1  |
| V43 | H    | 1H  | 8.771   | 0.005 | 10 |
| V43 | N    | 15N | 120.078 | 0.101 | 8  |
| I44 | CA   | 13C | 58.114  | 0.000 | 1  |
| I44 | CB   | 13C | 40.044  | 0.000 | 1  |
| I44 | CO-1 | 13C | 175.770 | 0.000 | 1  |
| I44 | H    | 1H  | 8.987   | 0.005 | 10 |
| I44 | N    | 15N | 127.655 | 0.095 | 8  |
| R45 | CA   | 13C | 54.061  | 0.000 | 1  |
| R45 | CA-1 | 13C | 58.336  | 0.000 | 1  |

|     |      |     |         |       |    |
|-----|------|-----|---------|-------|----|
| R45 | CB   | 13C | 32.421  | 0.000 | 1  |
| R45 | CB-1 | 13C | 40.031  | 0.000 | 1  |
| R45 | CO-1 | 13C | 176.041 | 0.000 | 1  |
| R45 | H    | 1H  | 9.058   | 0.005 | 8  |
| R45 | N    | 15N | 128.078 | 0.069 | 7  |
| R46 | CA   | 13C | 54.427  | 0.000 | 1  |
| R46 | CA-1 | 13C | 54.148  | 0.000 | 1  |
| R46 | CB   | 13C | 33.227  | 0.000 | 1  |
| R46 | CB-1 | 13C | 32.568  | 0.000 | 1  |
| R46 | CO-1 | 13C | 174.388 | 0.000 | 1  |
| R46 | H    | 1H  | 8.945   | 0.008 | 9  |
| R46 | N    | 15N | 127.534 | 0.092 | 8  |
| V47 | CA   | 13C | 58.030  | 0.000 | 1  |
| V47 | CA-1 | 13C | 54.669  | 0.000 | 1  |
| V47 | CB   | 13C | 35.138  | 0.000 | 1  |
| V47 | CB-1 | 13C | 33.065  | 0.000 | 1  |
| V47 | CO-1 | 13C | 174.580 | 0.000 | 1  |
| V47 | H    | 1H  | 8.467   | 0.005 | 10 |
| V47 | N    | 15N | 120.918 | 0.126 | 8  |
| K48 | CA   | 13C | 57.814  | 0.027 | 2  |
| K48 | CA-1 | 13C | 58.265  | 0.000 | 1  |
| K48 | CB   | 13C | 32.906  | 0.020 | 2  |
| K48 | CB-1 | 13C | 35.106  | 0.000 | 1  |
| K48 | CO-1 | 13C | 175.353 | 0.000 | 1  |
| K48 | H    | 1H  | 8.866   | 0.011 | 10 |
| K48 | N    | 15N | 125.378 | 0.183 | 8  |
| Y49 | CA   | 13C | 58.547  | 0.000 | 1  |
| Y49 | CB   | 13C | 38.729  | 0.000 | 1  |
| Y49 | CO-1 | 13C | 176.059 | 0.000 | 1  |
| Y49 | H    | 1H  | 8.436   | 0.012 | 10 |
| Y49 | N    | 15N | 127.450 | 0.140 | 8  |
| K53 | CA   | 13C | 59.581  | 0.000 | 1  |
| K53 | CA-1 | 13C | 58.822  | 0.000 | 1  |
| K53 | CB   | 13C | 31.482  | 0.000 | 1  |
| K53 | CB-1 | 13C | 29.128  | 0.000 | 1  |
| K53 | CO-1 | 13C | 178.092 | 0.000 | 1  |
| K53 | H    | 1H  | 8.202   | 0.004 | 12 |
| K53 | N    | 15N | 121.581 | 0.094 | 9  |
| A54 | CA   | 13C | 54.912  | 0.049 | 2  |
| A54 | CA-1 | 13C | 59.585  | 0.000 | 1  |
| A54 | CB   | 13C | 18.025  | 0.167 | 2  |
| A54 | CB-1 | 13C | 31.556  | 0.000 | 1  |
| A54 | CO-1 | 13C | 179.127 | 0.000 | 1  |
| A54 | H    | 1H  | 7.712   | 0.010 | 12 |
| A54 | N    | 15N | 122.023 | 0.093 | 9  |
| E55 | CA   | 13C | 59.087  | 0.000 | 1  |
| E55 | CB   | 13C | 29.100  | 0.000 | 1  |
| E55 | CO-1 | 13C | 179.773 | 0.000 | 1  |
| E55 | H    | 1H  | 7.407   | 0.009 | 12 |
| E55 | N    | 15N | 117.853 | 0.087 | 9  |
| K59 | CA   | 13C | 59.967  | 0.000 | 1  |
| K59 | CA-1 | 13C | 66.449  | 0.000 | 1  |
| K59 | CB   | 13C | 31.836  | 0.000 | 1  |
| K59 | CB-1 | 13C | 30.842  | 0.000 | 1  |
| K59 | CO-1 | 13C | 178.454 | 0.000 | 1  |
| K59 | H    | 1H  | 8.086   | 0.006 | 10 |
| K59 | N    | 15N | 119.965 | 0.037 | 8  |
| A60 | CA   | 13C | 54.654  | 0.000 | 1  |
| A60 | CA-1 | 13C | 59.932  | 0.000 | 1  |
| A60 | CB   | 13C | 17.701  | 0.000 | 1  |
| A60 | CB-1 | 13C | 31.820  | 0.000 | 1  |
| A60 | CO-1 | 13C | 179.762 | 0.000 | 1  |
| A60 | H    | 1H  | 7.294   | 0.008 | 12 |
| A60 | N    | 15N | 121.262 | 0.140 | 10 |

|     |      |     |         |       |    |
|-----|------|-----|---------|-------|----|
| A62 | C    | 13C | 179.762 | 0.000 | 0  |
| A62 | CA   | 13C | 53.394  | 0.000 | 1  |
| A62 | CB   | 13C | 17.672  | 0.000 | 1  |
| A62 | H    | 1H  | 7.713   | 0.010 | 9  |
| A62 | N    | 15N | 120.547 | 0.209 | 6  |
| K63 | CA   | 13C | 56.017  | 0.000 | 1  |
| K63 | CA-1 | 13C | 53.279  | 0.000 | 1  |
| K63 | CB   | 13C | 32.236  | 0.000 | 1  |
| K63 | CB-1 | 13C | 17.813  | 0.000 | 1  |
| K63 | CO-1 | 13C | 178.122 | 0.000 | 1  |
| K63 | H    | 1H  | 7.081   | 0.006 | 12 |
| K63 | N    | 15N | 115.582 | 0.097 | 9  |
| L64 | CA   | 13C | 55.295  | 0.000 | 1  |
| L64 | CA-1 | 13C | 55.926  | 0.000 | 1  |
| L64 | CB   | 13C | 41.140  | 0.000 | 1  |
| L64 | CB-1 | 13C | 32.070  | 0.000 | 1  |
| L64 | CO-1 | 13C | 177.945 | 0.000 | 1  |
| L64 | H    | 1H  | 7.364   | 0.007 | 12 |
| L64 | N    | 15N | 120.522 | 0.132 | 9  |
| D65 | CA   | 13C | 53.878  | 0.000 | 1  |
| D65 | CA-1 | 13C | 55.414  | 0.000 | 1  |
| D65 | CB   | 13C | 42.224  | 0.000 | 1  |
| D65 | CB-1 | 13C | 41.103  | 0.000 | 1  |
| D65 | CO-1 | 13C | 177.407 | 0.000 | 1  |
| D65 | H    | 1H  | 8.290   | 0.006 | 8  |
| D65 | N    | 15N | 121.627 | 0.151 | 7  |
| H66 | CA   | 13C | 57.561  | 0.000 | 1  |
| H66 | CA-1 | 13C | 54.111  | 0.000 | 1  |
| H66 | CB   | 13C | 34.085  | 0.000 | 1  |
| H66 | CB-1 | 13C | 42.649  | 0.000 | 1  |
| H66 | CO-1 | 13C | 173.015 | 0.000 | 1  |
| H66 | H    | 1H  | 8.716   | 0.004 | 9  |
| H66 | N    | 15N | 126.548 | 0.132 | 7  |
| V67 | CA   | 13C | 64.398  | 0.000 | 1  |
| V67 | CA-1 | 13C | 57.466  | 0.000 | 1  |
| V67 | CB   | 13C | 31.272  | 0.000 | 1  |
| V67 | CB-1 | 13C | 34.094  | 0.000 | 1  |
| V67 | CO-1 | 13C | 176.347 | 0.000 | 1  |
| V67 | H    | 1H  | 7.337   | 0.005 | 12 |
| V67 | N    | 15N | 124.619 | 0.094 | 10 |
| V70 | C    | 13C | 176.181 | 0.000 | 0  |
| V70 | CA   | 13C | 63.662  | 0.031 | 2  |
| V70 | CA-1 | 13C | 60.284  | 0.000 | 1  |
| V70 | CB   | 13C | 32.742  | 0.129 | 2  |
| V70 | CB-1 | 13C | 40.243  | 0.000 | 1  |
| V70 | CO-1 | 13C | 176.181 | 0.000 | 1  |
| V70 | H    | 1H  | 8.674   | 0.009 | 8  |
| V70 | N    | 15N | 127.961 | 0.104 | 7  |
| H71 | C    | 13C | 174.779 | 0.000 | 0  |
| H71 | CA   | 13C | 56.954  | 0.006 | 2  |
| H71 | CB   | 13C | 29.161  | 0.031 | 2  |
| H71 | CO-1 | 13C | 174.779 | 0.000 | 1  |
| H71 | H    | 1H  | 9.101   | 0.010 | 10 |
| H71 | N    | 15N | 123.906 | 0.101 | 8  |
| Y72 | C    | 13C | 174.908 | 0.000 | 0  |
| Y72 | CA   | 13C | 57.866  | 0.000 | 1  |
| Y72 | CB   | 13C | 38.947  | 0.000 | 1  |
| Y72 | CO-1 | 13C | 174.908 | 0.000 | 1  |
| Y72 | H    | 1H  | 8.750   | 0.013 | 8  |
| Y72 | N    | 15N | 126.696 | 0.115 | 7  |
| N73 | CA   | 13C | 55.602  | 0.000 | 1  |
| N73 | CA-1 | 13C | 58.000  | 0.000 | 1  |
| N73 | CB   | 13C | 40.969  | 0.000 | 1  |
| N73 | CB-1 | 13C | 38.920  | 0.000 | 1  |

|     |      |     |         |       |    |
|-----|------|-----|---------|-------|----|
| N73 | CO-1 | 13C | 175.122 | 0.000 | 1  |
| N73 | H    | 1H  | 8.881   | 0.007 | 12 |
| N73 | N    | 15N | 120.455 | 0.070 | 9  |
| G74 | CA   | 13C | 45.239  | 0.105 | 2  |
| G74 | CA-1 | 13C | 55.550  | 0.000 | 1  |
| G74 | CB-1 | 13C | 40.691  | 0.000 | 1  |
| G74 | CO-1 | 13C | 175.934 | 0.000 | 1  |
| G74 | H    | 1H  | 7.515   | 0.005 | 12 |
| G74 | N    | 15N | 103.685 | 0.096 | 9  |
| C75 | CA   | 13C | 55.693  | 0.001 | 2  |
| C75 | CA-1 | 13C | 45.133  | 0.053 | 2  |
| C75 | CB   | 13C | 32.228  | 0.101 | 2  |
| C75 | CO-1 | 13C | 171.115 | 0.000 | 1  |
| C75 | H    | 1H  | 8.564   | 0.007 | 8  |
| C75 | N    | 15N | 114.869 | 0.068 | 7  |
| W76 | CA   | 13C | 57.761  | 0.038 | 2  |
| W76 | CB   | 13C | 31.294  | 0.003 | 2  |
| W76 | CO-1 | 13C | 173.445 | 0.000 | 1  |
| W76 | H    | 1H  | 8.741   | 0.008 | 10 |
| W76 | N    | 15N | 120.948 | 0.118 | 8  |
| W76 | H*   | 1H  | 9.717   | 0.005 | 8  |
| W76 | N*   | 15N | 135.424 | 0.060 | 4  |
| D77 | C    | 13C | 172.673 | 0.000 | 0  |
| D77 | CA   | 13C | 51.980  | 0.027 | 2  |
| D77 | CB   | 13C | 44.352  | 0.035 | 2  |
| D77 | CO-1 | 13C | 172.673 | 0.000 | 1  |
| D77 | H    | 1H  | 8.417   | 0.009 | 8  |
| D77 | N    | 15N | 118.330 | 0.069 | 7  |
| G78 | CA   | 13C | 45.436  | 0.055 | 4  |
| G78 | CO-1 | 13C | 175.849 | 0.000 | 1  |
| G78 | H    | 1H  | 8.613   | 0.009 | 8  |
| G78 | N    | 15N | 108.546 | 0.065 | 7  |
| F79 | CA   | 13C | 58.216  | 0.005 | 2  |
| F79 | CB   | 13C | 40.566  | 0.006 | 2  |
| F79 | CO-1 | 13C | 173.210 | 0.000 | 1  |
| F79 | H    | 1H  | 8.794   | 0.010 | 9  |
| F79 | N    | 15N | 125.092 | 0.125 | 8  |
| D80 | CA   | 13C | 51.674  | 0.006 | 2  |
| D80 | CB   | 13C | 46.007  | 0.002 | 2  |
| D80 | CO-1 | 13C | 174.925 | 0.000 | 1  |
| D80 | H    | 1H  | 8.658   | 0.007 | 15 |
| D80 | N    | 15N | 124.460 | 0.162 | 10 |
| Y81 | CA   | 13C | 57.669  | 0.007 | 2  |
| Y81 | CB   | 13C | 38.380  | 0.072 | 2  |
| Y81 | CO-1 | 13C | 174.736 | 0.000 | 1  |
| Y81 | H    | 1H  | 8.525   | 0.005 | 13 |
| Y81 | N    | 15N | 119.555 | 0.096 | 10 |
| D82 | CA   | 13C | 51.626  | 0.000 | 1  |
| D82 | CB   | 13C | 42.136  | 0.000 | 1  |
| D82 | CO-1 | 13C | 174.628 | 0.000 | 1  |
| D82 | H    | 1H  | 7.838   | 0.010 | 14 |
| D82 | N    | 15N | 119.245 | 0.107 | 10 |
| S93 | CA   | 13C | 58.961  | 0.000 | 1  |
| S93 | CA-1 | 13C | 58.536  | 0.000 | 1  |
| S93 | CB   | 13C | 63.680  | 0.000 | 1  |
| S93 | CB-1 | 13C | 63.764  | 0.000 | 1  |
| S93 | CO-1 | 13C | 175.397 | 0.000 | 1  |
| S93 | H    | 1H  | 8.292   | 0.005 | 8  |
| S93 | N    | 15N | 119.036 | 0.071 | 7  |
| D94 | CA   | 13C | 54.434  | 0.000 | 1  |
| D94 | CA-1 | 13C | 58.978  | 0.000 | 1  |
| D94 | CB   | 13C | 41.069  | 0.000 | 1  |
| D94 | CB-1 | 13C | 63.583  | 0.000 | 1  |
| D94 | CO-1 | 13C | 174.770 | 0.000 | 1  |

|      |      |     |         |       |    |
|------|------|-----|---------|-------|----|
| D94  | H    | 1H  | 8.115   | 0.002 | 6  |
| D94  | N    | 15N | 122.369 | 0.064 | 6  |
| Y95  | CA   | 13C | 58.046  | 0.000 | 1  |
| Y95  | CA-1 | 13C | 54.476  | 0.000 | 1  |
| Y95  | CB   | 13C | 38.358  | 0.000 | 1  |
| Y95  | CB-1 | 13C | 41.100  | 0.000 | 1  |
| Y95  | H    | 1H  | 7.815   | 0.007 | 5  |
| Y95  | N    | 15N | 121.257 | 0.074 | 5  |
| S106 | CA   | 13C | 58.689  | 0.000 | 0  |
| S106 | CB   | 13C | 63.940  | 0.000 | 0  |
| K107 | CA   | 13C | 55.401  | 0.013 | 2  |
| K107 | CA-1 | 13C | 58.807  | 0.000 | 1  |
| K107 | CB   | 13C | 35.108  | 0.003 | 2  |
| K107 | CB-1 | 13C | 63.940  | 0.000 | 1  |
| K107 | CO-1 | 13C | 174.299 | 0.000 | 1  |
| K107 | H    | 1H  | 8.256   | 0.006 | 14 |
| K107 | N    | 15N | 122.766 | 0.076 | 10 |
| T108 | CA   | 13C | 60.602  | 0.056 | 2  |
| T108 | CB   | 13C | 71.094  | 0.021 | 2  |
| T108 | CO-1 | 13C | 176.004 | 0.000 | 1  |
| T108 | H    | 1H  | 8.981   | 0.007 | 14 |
| T108 | N    | 15N | 116.770 | 0.064 | 10 |
| K109 | CA   | 13C | 58.066  | 0.000 | 1  |
| K109 | CB   | 13C | 32.236  | 0.000 | 1  |
| K109 | CO-1 | 13C | 172.946 | 0.000 | 1  |
| K109 | H    | 1H  | 8.131   | 0.011 | 8  |
| K109 | N    | 15N | 126.530 | 0.133 | 7  |
| C110 | CA   | 13C | 59.010  | 0.000 | 1  |
| C110 | CA-1 | 13C | 58.152  | 0.000 | 1  |
| C110 | CB   | 13C | 31.825  | 0.000 | 1  |
| C110 | CB-1 | 13C | 32.158  | 0.000 | 1  |
| C110 | CO-1 | 13C | 176.731 | 0.000 | 1  |
| C110 | H    | 1H  | 8.721   | 0.010 | 6  |
| C110 | N    | 15N | 126.409 | 0.059 | 6  |
| L111 | C    | 13C | 172.507 | 0.000 | 0  |
| L111 | CA   | 13C | 53.306  | 0.014 | 2  |
| L111 | CA-1 | 13C | 59.013  | 0.000 | 1  |
| L111 | CB   | 13C | 44.849  | 0.022 | 2  |
| L111 | CB-1 | 13C | 31.847  | 0.000 | 1  |
| L111 | CO-1 | 13C | 172.507 | 0.000 | 1  |
| L111 | H    | 1H  | 8.859   | 0.006 | 10 |
| L111 | N    | 15N | 124.322 | 0.069 | 8  |
| F112 | CA   | 13C | 55.862  | 0.063 | 2  |
| F112 | CB   | 13C | 38.201  | 0.130 | 2  |
| F112 | CO-1 | 13C | 173.296 | 0.000 | 1  |
| F112 | H    | 1H  | 8.557   | 0.004 | 10 |
| F112 | N    | 15N | 124.629 | 0.110 | 8  |
| I113 | C    | 13C | 175.448 | 0.000 | 0  |
| I113 | CA   | 13C | 60.778  | 0.041 | 2  |
| I113 | CB   | 13C | 41.091  | 0.009 | 2  |
| I113 | CO-1 | 13C | 175.448 | 0.000 | 1  |
| I113 | H    | 1H  | 8.632   | 0.007 | 8  |
| I113 | N    | 15N | 121.388 | 0.086 | 7  |
| Q114 | C    | 13C | 174.289 | 0.000 | 0  |
| Q114 | CA   | 13C | 54.352  | 0.000 | 1  |
| Q114 | CB   | 13C | 29.736  | 0.005 | 2  |
| Q114 | CO-1 | 13C | 174.289 | 0.000 | 1  |
| Q114 | H    | 1H  | 8.533   | 0.009 | 12 |
| Q114 | N    | 15N | 129.352 | 0.057 | 9  |
| M115 | C    | 13C | 174.892 | 0.000 | 0  |
| M115 | CA   | 13C | 54.567  | 0.092 | 2  |
| M115 | CB   | 13C | 37.285  | 0.000 | 2  |
| M115 | CO-1 | 13C | 174.892 | 0.000 | 1  |
| M115 | H    | 1H  | 9.755   | 0.007 | 9  |

|      |      |     |         |       |    |
|------|------|-----|---------|-------|----|
| M115 | N    | 15N | 128.009 | 0.101 | 7  |
| E116 | C    | 13C | 177.707 | 0.000 | 0  |
| E116 | CA   | 13C | 56.319  | 0.122 | 2  |
| E116 | CB   | 13C | 31.332  | 0.014 | 2  |
| E116 | CO-1 | 13C | 174.232 | 0.000 | 1  |
| E116 | H    | 1H  | 8.097   | 0.008 | 10 |
| E116 | N    | 15N | 121.719 | 0.100 | 8  |
| F117 | CA   | 13C | 55.907  | 0.000 | 1  |
| F117 | CB   | 13C | 40.370  | 0.000 | 1  |
| F117 | CO-1 | 13C | 174.516 | 0.000 | 1  |
| F117 | H    | 1H  | 8.124   | 0.005 | 8  |
| F117 | N    | 15N | 123.227 | 0.141 | 7  |
| C118 | CA   | 13C | 57.858  | 0.000 | 1  |
| C118 | CA-1 | 13C | 55.864  | 0.000 | 1  |
| C118 | CB   | 13C | 28.042  | 0.000 | 1  |
| C118 | CB-1 | 13C | 40.437  | 0.000 | 1  |
| C118 | CO-1 | 13C | 175.019 | 0.000 | 1  |
| C118 | H    | 1H  | 7.963   | 0.003 | 6  |
| C118 | N    | 15N | 129.921 | 0.089 | 6  |
| D119 | CA   | 13C | 53.868  | 0.000 | 1  |
| D119 | CA-1 | 13C | 57.961  | 0.000 | 1  |
| D119 | CB   | 13C | 41.184  | 0.000 | 1  |
| D119 | CB-1 | 13C | 27.944  | 0.000 | 1  |
| D119 | CO-1 | 13C | 174.057 | 0.000 | 1  |
| D119 | H    | 1H  | 7.942   | 0.007 | 9  |
| D119 | N    | 15N | 124.500 | 0.146 | 8  |
| K120 | CA   | 13C | 54.417  | 0.000 | 1  |
| K120 | CA-1 | 13C | 54.130  | 0.000 | 1  |
| K120 | CB   | 13C | 32.443  | 0.000 | 1  |
| K120 | CB-1 | 13C | 41.161  | 0.000 | 1  |
| K120 | CO-1 | 13C | 173.072 | 0.000 | 1  |
| K120 | H    | 1H  | 7.646   | 0.017 | 11 |
| K120 | N    | 15N | 119.649 | 0.078 | 8  |
| G121 | CA   | 13C | 44.851  | 0.121 | 4  |
| G121 | CA-1 | 13C | 54.472  | 0.000 | 1  |
| G121 | CB-1 | 13C | 32.424  | 0.000 | 1  |
| G121 | CO-1 | 13C | 176.828 | 0.000 | 1  |
| G121 | H    | 1H  | 7.987   | 0.009 | 11 |
| G121 | N    | 15N | 108.411 | 0.148 | 9  |
| T122 | C    | 13C | 174.344 | 0.000 | 0  |
| T122 | CA   | 13C | 59.783  | 0.077 | 2  |
| T122 | CB   | 13C | 73.229  | 0.011 | 2  |
| T122 | CO-1 | 13C | 174.344 | 0.000 | 1  |
| T122 | H    | 1H  | 8.007   | 0.014 | 14 |
| T122 | N    | 15N | 108.364 | 0.154 | 10 |
| L123 | CA   | 13C | 56.473  | 0.038 | 2  |
| L123 | CB   | 13C | 41.147  | 0.006 | 2  |
| L123 | CO-1 | 13C | 178.056 | 0.000 | 1  |
| L123 | H    | 1H  | 9.276   | 0.009 | 15 |
| L123 | N    | 15N | 124.421 | 0.081 | 11 |
| E124 | C    | 13C | 177.985 | 0.000 | 0  |
| E124 | CA   | 13C | 58.996  | 0.060 | 2  |
| E124 | CB   | 13C | 29.151  | 0.000 | 2  |
| E124 | CO-1 | 13C | 177.985 | 0.000 | 1  |
| E124 | H    | 1H  | 6.907   | 0.005 | 17 |
| E124 | N    | 15N | 120.726 | 0.092 | 11 |
| Q125 | C    | 13C | 178.359 | 0.000 | 0  |
| Q125 | CA   | 13C | 58.700  | 0.019 | 2  |
| Q125 | CB   | 13C | 28.070  | 0.030 | 2  |
| Q125 | CO-1 | 13C | 178.359 | 0.000 | 1  |
| Q125 | H    | 1H  | 7.513   | 0.008 | 17 |
| Q125 | N    | 15N | 119.774 | 0.082 | 11 |
| W126 | C    | 13C | 178.446 | 0.000 | 0  |
| W126 | CA   | 13C | 62.263  | 0.000 | 1  |

|      |      |     |         |       |    |
|------|------|-----|---------|-------|----|
| W126 | CB   | 13C | 29.774  | 0.000 | 1  |
| W126 | CO-1 | 13C | 178.446 | 0.000 | 1  |
| W126 | H    | 1H  | 7.790   | 0.007 | 15 |
| W126 | N    | 15N | 123.513 | 0.133 | 11 |
| I127 | CA   | 13C | 54.288  | 0.000 | 1  |
| I127 | CA-1 | 13C | 62.242  | 0.000 | 1  |
| I127 | CB   | 13C | 37.930  | 0.000 | 1  |
| I127 | CB-1 | 13C | 29.711  | 0.000 | 1  |
| I127 | CO-1 | 13C | 179.055 | 0.000 | 1  |
| I127 | H    | 1H  | 8.689   | 0.008 | 13 |
| I127 | N    | 15N | 120.956 | 0.093 | 10 |
| E128 | CA   | 13C | 59.322  | 0.000 | 1  |
| E128 | CA-1 | 13C | 54.448  | 0.000 | 1  |
| E128 | CB   | 13C | 29.131  | 0.000 | 1  |
| E128 | CB-1 | 13C | 37.986  | 0.000 | 1  |
| E128 | CO-1 | 13C | 179.504 | 0.000 | 1  |
| E128 | H    | 1H  | 7.802   | 0.008 | 6  |
| E128 | N    | 15N | 120.730 | 0.044 | 6  |
| K129 | CA   | 13C | 57.906  | 0.000 | 1  |
| K129 | CA-1 | 13C | 59.325  | 0.000 | 1  |
| K129 | CB   | 13C | 31.826  | 0.000 | 1  |
| K129 | CB-1 | 13C | 29.073  | 0.000 | 1  |
| K129 | H    | 1H  | 7.722   | 0.009 | 12 |
| K129 | N    | 15N | 119.382 | 0.091 | 9  |
| R130 | CA   | 13C | 55.628  | 0.000 | 1  |
| R130 | CA-1 | 13C | 57.927  | 0.000 | 1  |
| R130 | CB   | 13C | 29.665  | 0.000 | 1  |
| R130 | CB-1 | 13C | 31.865  | 0.000 | 1  |
| R130 | CO-1 | 13C | 177.253 | 0.000 | 1  |
| R130 | H    | 1H  | 7.072   | 0.004 | 13 |
| R130 | N    | 15N | 118.839 | 0.149 | 10 |
| R131 | CA   | 13C | 59.075  | 0.000 | 1  |
| R131 | CA-1 | 13C | 55.765  | 0.000 | 1  |
| R131 | CB   | 13C | 29.322  | 0.000 | 1  |
| R131 | CB-1 | 13C | 29.732  | 0.000 | 1  |
| R131 | CO-1 | 13C | 175.766 | 0.000 | 1  |
| R131 | H    | 1H  | 6.903   | 0.006 | 14 |
| R131 | N    | 15N | 118.403 | 0.117 | 10 |
| G132 | CA   | 13C | 45.382  | 0.083 | 2  |
| G132 | CA-1 | 13C | 58.960  | 0.000 | 1  |
| G132 | CB-1 | 13C | 29.523  | 0.000 | 1  |
| G132 | CO-1 | 13C | 177.847 | 0.000 | 1  |
| G132 | H    | 1H  | 7.984   | 0.007 | 10 |
| G132 | N    | 15N | 111.380 | 0.070 | 8  |
| E133 | CA   | 13C | 54.441  | 0.000 | 1  |
| E133 | CA-1 | 13C | 45.454  | 0.006 | 2  |
| E133 | CB   | 13C | 30.819  | 0.000 | 1  |
| E133 | CO-1 | 13C | 174.640 | 0.000 | 1  |
| E133 | H    | 1H  | 7.984   | 0.011 | 8  |
| E133 | N    | 15N | 121.013 | 0.070 | 7  |
| K134 | CA   | 13C | 55.895  | 0.000 | 1  |
| K134 | CA-1 | 13C | 54.484  | 0.000 | 1  |
| K134 | CB   | 13C | 32.375  | 0.000 | 1  |
| K134 | CB-1 | 13C | 30.775  | 0.000 | 1  |
| K134 | H    | 1H  | 8.134   | 0.003 | 5  |
| K134 | N    | 15N | 120.487 | 0.048 | 5  |
| L135 | CA   | 13C | 55.741  | 0.000 | 1  |
| L135 | CA-1 | 13C | 55.882  | 0.000 | 1  |
| L135 | CB   | 13C | 42.169  | 0.000 | 1  |
| L135 | CB-1 | 13C | 32.314  | 0.000 | 1  |
| L135 | CO-1 | 13C | 177.143 | 0.000 | 1  |
| L135 | H    | 1H  | 8.346   | 0.011 | 8  |
| L135 | N    | 15N | 125.945 | 0.084 | 7  |
| D136 | CA   | 13C | 52.585  | 0.000 | 1  |

|      |      |     |         |       |    |
|------|------|-----|---------|-------|----|
| D136 | CA-1 | 13C | 56.034  | 0.000 | 1  |
| D136 | CB   | 13C | 40.641  | 0.000 | 1  |
| D136 | CB-1 | 13C | 42.054  | 0.000 | 1  |
| D136 | CO-1 | 13C | 176.466 | 0.000 | 1  |
| D136 | H    | 1H  | 7.923   | 0.009 | 6  |
| D136 | N    | 15N | 126.443 | 0.077 | 6  |
| K137 | CA   | 13C | 60.344  | 0.000 | 1  |
| K137 | CA-1 | 13C | 52.606  | 0.000 | 1  |
| K137 | CB   | 13C | 32.421  | 0.000 | 1  |
| K137 | CB-1 | 13C | 41.067  | 0.000 | 1  |
| K137 | CO-1 | 13C | 177.329 | 0.000 | 1  |
| K137 | H    | 1H  | 8.959   | 0.014 | 11 |
| K137 | N    | 15N | 128.556 | 0.163 | 9  |
| V138 | CA   | 13C | 66.421  | 0.000 | 1  |
| V138 | CA-1 | 13C | 60.391  | 0.000 | 1  |
| V138 | CB   | 13C | 31.316  | 0.000 | 1  |
| V138 | CB-1 | 13C | 32.387  | 0.000 | 1  |
| V138 | H    | 1H  | 7.717   | 0.005 | 9  |
| V138 | N    | 15N | 119.439 | 0.136 | 7  |
| L139 | CA   | 13C | 57.286  | 0.000 | 1  |
| L139 | CA-1 | 13C | 66.199  | 0.000 | 1  |
| L139 | CB   | 13C | 41.689  | 0.000 | 1  |
| L139 | CB-1 | 13C | 30.850  | 0.000 | 1  |
| L139 | CO-1 | 13C | 179.736 | 0.000 | 1  |
| L139 | H    | 1H  | 7.492   | 0.012 | 13 |
| L139 | N    | 15N | 122.007 | 0.122 | 10 |
| A140 | CA   | 13C | 55.811  | 0.028 | 2  |
| A140 | CA-1 | 13C | 57.176  | 0.000 | 1  |
| A140 | CB   | 13C | 18.586  | 0.201 | 2  |
| A140 | CB-1 | 13C | 41.668  | 0.000 | 1  |
| A140 | CO-1 | 13C | 178.987 | 0.000 | 1  |
| A140 | H    | 1H  | 7.766   | 0.005 | 13 |
| A140 | N    | 15N | 119.874 | 0.113 | 9  |
| L141 | CA   | 13C | 57.404  | 0.000 | 1  |
| L141 | CB   | 13C | 41.061  | 0.000 | 1  |
| L141 | CO-1 | 13C | 180.042 | 0.000 | 1  |
| L141 | H    | 1H  | 8.285   | 0.006 | 13 |
| L141 | N    | 15N | 115.848 | 0.113 | 10 |
| E142 | CA   | 13C | 59.605  | 0.000 | 1  |
| E142 | CA-1 | 13C | 57.534  | 0.000 | 1  |
| E142 | CB   | 13C | 29.099  | 0.000 | 1  |
| E142 | CO-1 | 13C | 180.527 | 0.000 | 1  |
| E142 | H    | 1H  | 8.110   | 0.004 | 10 |
| E142 | N    | 15N | 125.346 | 0.075 | 8  |
| L143 | CA   | 13C | 57.735  | 0.000 | 1  |
| L143 | CA-1 | 13C | 59.485  | 0.000 | 1  |
| L143 | CB   | 13C | 40.375  | 0.000 | 1  |
| L143 | CB-1 | 13C | 29.099  | 0.000 | 1  |
| L143 | CO-1 | 13C | 180.419 | 0.000 | 1  |
| L143 | H    | 1H  | 8.039   | 0.009 | 10 |
| L143 | N    | 15N | 119.433 | 0.093 | 8  |
| F144 | CA   | 13C | 62.126  | 0.000 | 1  |
| F144 | CA-1 | 13C | 57.719  | 0.000 | 1  |
| F144 | CB   | 13C | 39.018  | 0.000 | 1  |
| F144 | CB-1 | 13C | 39.852  | 0.000 | 1  |
| F144 | CO-1 | 13C | 179.752 | 0.000 | 1  |
| F144 | H    | 1H  | 8.428   | 0.006 | 12 |
| F144 | N    | 15N | 118.617 | 0.135 | 9  |
| E145 | CA   | 13C | 60.185  | 0.000 | 1  |
| E145 | CA-1 | 13C | 61.977  | 0.000 | 1  |
| E145 | CB   | 13C | 29.226  | 0.000 | 1  |
| E145 | CB-1 | 13C | 39.055  | 0.000 | 1  |
| E145 | CO-1 | 13C | 178.375 | 0.000 | 1  |
| E145 | H    | 1H  | 8.771   | 0.006 | 14 |



|      |      |     |         |       |    |
|------|------|-----|---------|-------|----|
| E145 | N    | 15N | 123.648 | 0.112 | 11 |
| Q146 | CA   | 13C | 59.591  | 0.000 | 1  |
| Q146 | CA-1 | 13C | 60.120  | 0.000 | 1  |
| Q146 | CB   | 13C | 29.820  | 0.000 | 1  |
| Q146 | CB-1 | 13C | 29.041  | 0.000 | 1  |
| Q146 | CO-1 | 13C | 177.806 | 0.000 | 1  |
| Q146 | H    | 1H  | 7.246   | 0.010 | 12 |
| Q146 | N    | 15N | 118.343 | 0.087 | 9  |
| I147 | CA   | 13C | 65.056  | 0.000 | 1  |
| I147 | CA-1 | 13C | 59.747  | 0.000 | 1  |
| I147 | CB   | 13C | 38.387  | 0.000 | 1  |
| I147 | CO-1 | 13C | 178.444 | 0.000 | 1  |
| I147 | H    | 1H  | 7.600   | 0.008 | 11 |
| I147 | N    | 15N | 118.433 | 0.089 | 8  |
| T148 | CB   | 13C | 67.266  | 0.000 | 0  |
| K149 | C    | 13C | 176.807 | 0.000 | 0  |
| K149 | CA   | 13C | 60.547  | 0.089 | 2  |
| K149 | CA-1 | 13C | 68.063  | 0.000 | 1  |
| K149 | CB   | 13C | 32.104  | 0.177 | 2  |
| K149 | CB-1 | 13C | 67.266  | 0.000 | 1  |
| K149 | CO-1 | 13C | 176.807 | 0.000 | 1  |
| K149 | H    | 1H  | 8.469   | 0.008 | 10 |
| K149 | N    | 15N | 124.022 | 0.118 | 8  |
| G150 | C    | 13C | 180.166 | 0.000 | 0  |
| G150 | CA   | 13C | 46.931  | 0.160 | 4  |
| G150 | CO-1 | 13C | 180.166 | 0.000 | 1  |
| G150 | H    | 1H  | 7.906   | 0.016 | 14 |
| G150 | N    | 15N | 107.965 | 0.074 | 10 |
| V151 | CA   | 13C | 66.469  | 0.023 | 2  |
| V151 | CB   | 13C | 29.959  | 0.241 | 2  |
| V151 | CO-1 | 13C | 175.033 | 0.000 | 1  |
| V151 | H    | 1H  | 8.061   | 0.006 | 13 |
| V151 | N    | 15N | 123.019 | 0.108 | 10 |
| D152 | CA   | 13C | 57.433  | 0.023 | 2  |
| D152 | CB   | 13C | 43.370  | 0.005 | 2  |
| D152 | CO-1 | 13C | 176.236 | 0.000 | 1  |
| D152 | H    | 1H  | 8.844   | 0.007 | 14 |
| D152 | N    | 15N | 121.194 | 0.084 | 10 |
| Y153 | CA   | 13C | 61.186  | 0.049 | 2  |
| Y153 | CB   | 13C | 37.622  | 0.022 | 2  |
| Y153 | CO-1 | 13C | 178.692 | 0.000 | 1  |
| Y153 | H    | 1H  | 7.499   | 0.008 | 15 |
| Y153 | N    | 15N | 120.654 | 0.079 | 10 |
| I154 | CA   | 13C | 66.648  | 0.163 | 2  |
| I154 | CB   | 13C | 37.667  | 0.132 | 2  |
| I154 | CO-1 | 13C | 179.041 | 0.000 | 1  |
| I154 | H    | 1H  | 7.952   | 0.008 | 12 |
| I154 | N    | 15N | 122.262 | 0.159 | 9  |
| H155 | C    | 13C | 178.916 | 0.000 | 0  |
| H155 | CA   | 13C | 57.630  | 0.000 | 1  |
| H155 | CB   | 13C | 30.853  | 0.000 | 1  |
| H155 | CO-1 | 13C | 178.916 | 0.000 | 1  |
| H155 | H    | 1H  | 9.083   | 0.008 | 15 |
| H155 | N    | 15N | 119.897 | 0.133 | 11 |
| S156 | C    | 13C | 181.657 | 0.000 | 0  |
| S156 | CA   | 13C | 61.600  | 0.144 | 2  |
| S156 | CO-1 | 13C | 181.657 | 0.000 | 1  |
| S156 | H    | 1H  | 8.440   | 0.005 | 12 |
| S156 | N    | 15N | 121.889 | 0.097 | 8  |
| K157 | C    | 13C | 175.727 | 0.000 | 0  |
| K157 | CA   | 13C | 53.852  | 0.026 | 2  |
| K157 | CB   | 13C | 30.218  | 0.017 | 2  |
| K157 | CO-1 | 13C | 175.727 | 0.000 | 1  |
| K157 | H    | 1H  | 7.165   | 0.008 | 14 |

|      |      |     |         |       |    |
|------|------|-----|---------|-------|----|
| K157 | N    | 15N | 122.591 | 0.095 | 9  |
| K158 | CA   | 13C | 57.043  | 0.000 | 1  |
| K158 | CB   | 13C | 27.762  | 0.214 | 2  |
| K158 | CO-1 | 13C | 175.375 | 0.000 | 1  |
| K158 | H    | 1H  | 7.944   | 0.008 | 14 |
| K158 | N    | 15N | 113.882 | 0.084 | 10 |
| L159 | C    | 13C | 175.681 | 0.000 | 0  |
| L159 | CA   | 13C | 53.129  | 0.000 | 1  |
| L159 | CA-1 | 13C | 57.177  | 0.000 | 1  |
| L159 | CB   | 13C | 44.975  | 0.000 | 1  |
| L159 | CO-1 | 13C | 175.681 | 0.000 | 1  |
| L159 | H    | 1H  | 7.342   | 0.006 | 13 |
| L159 | N    | 15N | 120.051 | 0.059 | 9  |
| I160 | CA   | 13C | 60.333  | 0.000 | 0  |
| I160 | CB   | 13C | 39.459  | 0.000 | 0  |
| R162 | CA   | 13C | 60.200  | 0.000 | 1  |
| R162 | CA-1 | 13C | 61.568  | 0.000 | 1  |
| R162 | CB   | 13C | 30.221  | 0.000 | 1  |
| R162 | CO-1 | 13C | 178.376 | 0.000 | 1  |
| R162 | H    | 1H  | 9.390   | 0.005 | 12 |
| R162 | N    | 15N | 110.619 | 0.104 | 9  |
| D163 | CA   | 13C | 52.785  | 0.000 | 1  |
| D163 | CA-1 | 13C | 60.168  | 0.000 | 1  |
| D163 | CB   | 13C | 42.161  | 0.000 | 1  |
| D163 | CO-1 | 13C | 175.856 | 0.000 | 1  |
| D163 | H    | 1H  | 10.039  | 0.008 | 13 |
| D163 | N    | 15N | 127.458 | 0.071 | 9  |
| L164 | CA   | 13C | 55.978  | 0.000 | 1  |
| L164 | CA-1 | 13C | 52.800  | 0.000 | 1  |
| L164 | CB   | 13C | 41.060  | 0.000 | 1  |
| L164 | CB-1 | 13C | 42.200  | 0.000 | 1  |
| L164 | CO-1 | 13C | 175.450 | 0.000 | 1  |
| L164 | H    | 1H  | 8.898   | 0.008 | 11 |
| L164 | N    | 15N | 125.119 | 0.103 | 9  |
| K165 | CA   | 13C | 53.777  | 0.000 | 1  |
| K165 | CA-1 | 13C | 56.090  | 0.000 | 1  |
| K165 | CB   | 13C | 30.288  | 0.000 | 1  |
| K165 | CB-1 | 13C | 41.100  | 0.000 | 1  |
| K165 | CO-1 | 13C | 175.103 | 0.000 | 1  |
| K165 | H    | 1H  | 6.610   | 0.007 | 8  |
| K165 | N    | 15N | 116.626 | 0.149 | 7  |
| S167 | CA   | 13C | 60.168  | 0.000 | 1  |
| S167 | CA-1 | 13C | 66.167  | 0.000 | 1  |
| S167 | CB   | 13C | 62.331  | 0.000 | 1  |
| S167 | CB-1 | 13C | 31.274  | 0.000 | 1  |
| S167 | CO-1 | 13C | 177.411 | 0.000 | 1  |
| S167 | H    | 1H  | 8.409   | 0.022 | 12 |
| S167 | N    | 15N | 112.209 | 0.089 | 9  |
| N168 | CA   | 13C | 51.476  | 0.000 | 1  |
| N168 | CA-1 | 13C | 60.195  | 0.000 | 1  |
| N168 | CB   | 13C | 39.922  | 0.000 | 1  |
| N168 | CO-1 | 13C | 176.634 | 0.000 | 1  |
| N168 | H    | 1H  | 7.636   | 0.008 | 11 |
| N168 | N    | 15N | 119.596 | 0.053 | 8  |
| I169 | CA   | 13C | 60.368  | 0.000 | 1  |
| I169 | CA-1 | 13C | 51.600  | 0.000 | 1  |
| I169 | CB   | 13C | 39.465  | 0.000 | 1  |
| I169 | CB-1 | 13C | 39.818  | 0.000 | 1  |
| I169 | CO-1 | 13C | 172.679 | 0.000 | 1  |
| I169 | H    | 1H  | 6.709   | 0.009 | 15 |
| I169 | N    | 15N | 119.539 | 0.084 | 10 |
| F170 | CA   | 13C | 57.431  | 0.039 | 2  |
| F170 | CA-1 | 13C | 60.333  | 0.000 | 1  |
| F170 | CB   | 13C | 41.108  | 0.062 | 2  |

|      |      |     |         |       |    |
|------|------|-----|---------|-------|----|
| F170 | CB-1 | 13C | 39.459  | 0.000 | 1  |
| F170 | CO-1 | 13C | 173.949 | 0.000 | 1  |
| F170 | H    | 1H  | 9.133   | 0.006 | 9  |
| F170 | N    | 15N | 127.001 | 0.060 | 8  |
| L171 | CA   | 13C | 53.968  | 0.106 | 2  |
| L171 | CB   | 13C | 41.719  | 0.007 | 2  |
| L171 | CO-1 | 13C | 175.369 | 0.000 | 1  |
| L171 | H    | 1H  | 8.388   | 0.006 | 8  |
| L171 | N    | 15N | 124.284 | 0.089 | 7  |
| V172 | CA   | 13C | 61.849  | 0.075 | 2  |
| V172 | CB   | 13C | 32.333  | 0.029 | 2  |
| V172 | CO-1 | 13C | 176.708 | 0.000 | 1  |
| V172 | H    | 1H  | 8.185   | 0.001 | 8  |
| V172 | N    | 15N | 119.279 | 0.160 | 7  |
| D173 | CA   | 13C | 53.761  | 0.020 | 2  |
| D173 | CB   | 13C | 41.657  | 0.023 | 2  |
| D173 | CO-1 | 13C | 175.514 | 0.000 | 1  |
| D173 | H    | 1H  | 8.313   | 0.007 | 11 |
| D173 | N    | 15N | 121.302 | 0.062 | 8  |
| T174 | CA   | 13C | 65.168  | 0.010 | 2  |
| T174 | CB   | 13C | 69.078  | 0.021 | 2  |
| T174 | CO-1 | 13C | 176.006 | 0.000 | 1  |
| T174 | H    | 1H  | 8.499   | 0.004 | 13 |
| T174 | N    | 15N | 113.593 | 0.100 | 10 |
| K175 | CA   | 13C | 54.936  | 0.054 | 2  |
| K175 | CB   | 13C | 32.940  | 0.039 | 2  |
| K175 | CO-1 | 13C | 174.799 | 0.000 | 1  |
| K175 | H    | 1H  | 8.136   | 0.007 | 12 |
| K175 | N    | 15N | 116.735 | 0.083 | 9  |
| Q176 | CA   | 13C | 55.037  | 0.089 | 2  |
| Q176 | CB   | 13C | 31.279  | 0.027 | 2  |
| Q176 | CO-1 | 13C | 175.197 | 0.000 | 1  |
| Q176 | H    | 1H  | 7.289   | 0.007 | 14 |
| Q176 | N    | 15N | 120.221 | 0.112 | 10 |
| V177 | C    | 13C | 175.172 | 0.000 | 0  |
| V177 | CA   | 13C | 59.201  | 0.030 | 2  |
| V177 | CB   | 13C | 34.578  | 0.017 | 2  |
| V177 | CO-1 | 13C | 175.172 | 0.000 | 1  |
| V177 | H    | 1H  | 7.888   | 0.004 | 9  |
| V177 | N    | 15N | 119.934 | 0.050 | 8  |
| K178 | CA   | 13C | 55.118  | 0.057 | 2  |
| K178 | CB   | 13C | 37.028  | 0.184 | 2  |
| K178 | CO-1 | 13C | 176.335 | 0.000 | 1  |
| K178 | H    | 1H  | 9.039   | 0.006 | 8  |
| K178 | N    | 15N | 121.532 | 0.067 | 7  |
| I179 | CA   | 13C | 63.295  | 0.022 | 2  |
| I179 | CB   | 13C | 38.953  | 0.007 | 2  |
| I179 | CO-1 | 13C | 175.484 | 0.000 | 1  |
| I179 | H    | 1H  | 8.992   | 0.004 | 8  |
| I179 | N    | 15N | 125.715 | 0.088 | 7  |
| G180 | CA   | 13C | 44.683  | 0.091 | 2  |
| G180 | CO-1 | 13C | 175.592 | 0.000 | 1  |
| G180 | H    | 1H  | 8.433   | 0.011 | 8  |
| G180 | N    | 15N | 115.336 | 0.054 | 7  |
| D181 | CA   | 13C | 55.521  | 0.000 | 1  |
| D181 | CB   | 13C | 41.577  | 0.000 | 1  |
| D181 | CO-1 | 13C | 172.824 | 0.000 | 1  |
| D181 | H    | 1H  | 8.316   | 0.005 | 9  |
| D181 | N    | 15N | 119.069 | 0.182 | 8  |
| D181 | h    | 1H  | 8.298   | 0.000 | 0  |
| G181 | CA-1 | 13C | 44.866  | 0.000 | 1  |
| G183 | CA   | 13C | 46.551  | 0.013 | 2  |
| G183 | CA-1 | 13C | 58.471  | 0.000 | 1  |
| G183 | CB-1 | 13C | 38.936  | 0.000 | 1  |

|      |      |     |         |       |    |
|------|------|-----|---------|-------|----|
| G183 | CO-1 | 13C | 177.349 | 0.000 | 1  |
| G183 | H    | 1H  | 8.149   | 0.008 | 11 |
| G183 | N    | 15N | 108.947 | 0.081 | 9  |
| T186 | CA   | 13C | 61.531  | 0.000 | 0  |
| T186 | CB   | 13C | 69.954  | 0.000 | 0  |
| S187 | C    | 13C | 175.004 | 0.000 | 0  |
| S187 | CA   | 13C | 58.580  | 0.000 | 1  |
| S187 | CA-1 | 13C | 61.531  | 0.000 | 1  |
| S187 | CB   | 13C | 63.943  | 0.000 | 1  |
| S187 | CB-1 | 13C | 69.954  | 0.000 | 1  |
| S187 | CO-1 | 13C | 175.004 | 0.000 | 1  |
| S187 | H    | 1H  | 8.018   | 0.005 | 8  |
| S187 | N    | 15N | 119.000 | 0.049 | 7  |
| L188 | CA   | 13C | 55.403  | 0.000 | 1  |
| L188 | CA-1 | 13C | 58.494  | 0.000 | 1  |
| L188 | CB   | 13C | 41.727  | 0.000 | 1  |
| L188 | CB-1 | 13C | 64.114  | 0.000 | 1  |
| L188 | CO-1 | 13C | 174.718 | 0.000 | 1  |
| L188 | H    | 1H  | 8.048   | 0.015 | 8  |
| L188 | N    | 15N | 124.840 | 0.115 | 7  |
| K189 | CA   | 13C | 56.419  | 0.000 | 1  |
| K189 | CA-1 | 13C | 55.517  | 0.000 | 1  |
| K189 | CB   | 13C | 32.527  | 0.000 | 1  |
| K189 | CB-1 | 13C | 41.744  | 0.000 | 1  |
| K189 | CO-1 | 13C | 177.707 | 0.000 | 1  |
| K189 | H    | 1H  | 8.077   | 0.007 | 8  |
| K189 | N    | 15N | 121.833 | 0.112 | 7  |
| N190 | CA   | 13C | 53.256  | 0.000 | 1  |
| N190 | CA-1 | 13C | 56.352  | 0.000 | 1  |
| N190 | CB   | 13C | 38.880  | 0.000 | 1  |
| N190 | CB-1 | 13C | 32.504  | 0.000 | 1  |
| N190 | CO-1 | 13C | 176.732 | 0.000 | 1  |
| N190 | H    | 1H  | 8.349   | 0.006 | 6  |
| N190 | N    | 15N | 120.767 | 0.088 | 6  |
| D191 | CA   | 13C | 54.371  | 0.000 | 1  |
| D191 | CA-1 | 13C | 53.413  | 0.000 | 1  |
| D191 | CB   | 13C | 41.048  | 0.000 | 1  |
| D191 | CB-1 | 13C | 38.935  | 0.000 | 1  |
| D191 | CO-1 | 13C | 175.360 | 0.000 | 1  |
| D191 | H    | 1H  | 8.121   | 0.004 | 8  |
| D191 | N    | 15N | 121.464 | 0.177 | 7  |
| G192 | CA   | 13C | 45.864  | 0.064 | 2  |
| G192 | CA-1 | 13C | 54.318  | 0.000 | 1  |
| G192 | CB-1 | 13C | 41.170  | 0.000 | 1  |
| G192 | CO-1 | 13C | 177.359 | 0.000 | 1  |
| G192 | H    | 1H  | 8.273   | 0.012 | 8  |
| G192 | N    | 15N | 109.845 | 0.106 | 7  |
| K193 | CA   | 13C | 56.515  | 0.000 | 1  |
| K193 | CA-1 | 13C | 45.924  | 0.028 | 2  |
| K193 | CB   | 13C | 32.432  | 0.000 | 1  |
| K193 | CO-1 | 13C | 175.019 | 0.000 | 1  |
| K193 | H    | 1H  | 8.063   | 0.008 | 8  |
| K193 | N    | 15N | 121.336 | 0.094 | 7  |
| Q208 | C    | 13C | 177.515 | 0.000 | 0  |
| Q208 | CA   | 13C | 57.224  | 0.099 | 2  |
| Q208 | CA-1 | 13C | 58.679  | 0.000 | 1  |
| Q208 | CB   | 13C | 29.770  | 0.087 | 2  |
| Q208 | CB-1 | 13C | 26.955  | 0.000 | 1  |
| Q208 | CO-1 | 13C | 177.515 | 0.000 | 1  |
| Q208 | H    | 1H  | 7.176   | 0.006 | 12 |
| Q208 | N    | 15N | 120.635 | 0.088 | 9  |
| I209 | C    | 13C | 178.286 | 0.000 | 0  |
| I209 | CA   | 13C | 63.588  | 0.030 | 2  |
| I209 | CB   | 13C | 37.825  | 0.024 | 2  |

|      |      |     |         |       |    |
|------|------|-----|---------|-------|----|
| I209 | CO-1 | 13C | 178.286 | 0.000 | 1  |
| I209 | H    | 1H  | 7.384   | 0.011 | 13 |
| I209 | N    | 15N | 119.316 | 0.121 | 9  |
| S210 | CA   | 13C | 59.028  | 0.035 | 2  |
| S210 | CB   | 13C | 63.965  | 0.088 | 2  |
| S210 | CO-1 | 13C | 178.055 | 0.000 | 1  |
| S210 | H    | 1H  | 7.600   | 0.006 | 14 |
| S210 | N    | 15N | 113.289 | 0.118 | 10 |
| S211 | CA   | 13C | 58.335  | 0.127 | 2  |
| S211 | CB   | 13C | 63.780  | 0.173 | 2  |
| S211 | CO-1 | 13C | 174.395 | 0.000 | 1  |
| S211 | H    | 1H  | 7.750   | 0.006 | 13 |
| S211 | N    | 15N | 116.455 | 0.081 | 10 |
| Q212 | CA   | 13C | 55.088  | 0.094 | 2  |
| Q212 | CB   | 13C | 29.744  | 0.049 | 2  |
| Q212 | CO-1 | 13C | 173.950 | 0.000 | 1  |
| Q212 | H    | 1H  | 8.248   | 0.010 | 10 |
| Q212 | N    | 15N | 118.941 | 0.117 | 8  |
| D213 | C    | 13C | 176.040 | 0.000 | 0  |
| D213 | CA   | 13C | 54.127  | 0.004 | 2  |
| D213 | CB   | 13C | 41.070  | 0.021 | 2  |
| D213 | CO-1 | 13C | 176.040 | 0.000 | 1  |
| D213 | H    | 1H  | 8.160   | 0.009 | 9  |
| D213 | N    | 15N | 121.281 | 0.038 | 8  |
| Y214 | CA   | 13C | 56.114  | 0.032 | 2  |
| Y214 | CB   | 13C | 39.011  | 0.004 | 2  |
| Y214 | CO-1 | 13C | 174.858 | 0.000 | 1  |
| Y214 | H    | 1H  | 7.040   | 0.011 | 11 |
| Y214 | N    | 15N | 118.351 | 0.106 | 8  |
| G215 | CA   | 13C | 44.547  | 0.127 | 4  |
| G215 | CO-1 | 13C | 174.785 | 0.000 | 1  |
| G215 | H    | 1H  | 8.746   | 0.010 | 15 |
| G215 | N    | 15N | 110.780 | 0.096 | 10 |
| K216 | CA   | 13C | 58.318  | 0.020 | 2  |
| K216 | CB   | 13C | 29.639  | 0.070 | 2  |
| K216 | CO-1 | 13C | 175.351 | 0.000 | 1  |
| K216 | H    | 1H  | 8.511   | 0.007 | 12 |
| K216 | N    | 15N | 120.337 | 0.116 | 9  |
| E217 | CA   | 13C | 59.587  | 0.023 | 2  |
| E217 | CB   | 13C | 27.458  | 0.009 | 2  |
| E217 | CO-1 | 13C | 176.988 | 0.000 | 1  |
| E217 | H    | 1H  | 9.630   | 0.009 | 14 |
| E217 | N    | 15N | 120.676 | 0.106 | 10 |
| V218 | CA   | 13C | 64.923  | 0.000 | 1  |
| V218 | CB   | 13C | 29.865  | 0.000 | 1  |
| V218 | CO   | 13C | 180.556 | 0.000 | 0  |
| V218 | CO-1 | 13C | 180.556 | 0.000 | 1  |
| V218 | H    | 1H  | 8.199   | 0.004 | 16 |
| V218 | N    | 15N | 119.772 | 0.074 | 12 |
| D219 | C    | 13C | 178.583 | 0.000 | 0  |
| D219 | CA   | 13C | 56.167  | 0.000 | 2  |
| D219 | CB   | 13C | 41.012  | 0.016 | 2  |
| D219 | CO-1 | 13C | 178.583 | 0.000 | 1  |
| D219 | H    | 1H  | 7.479   | 0.007 | 13 |
| D219 | N    | 15N | 123.991 | 0.074 | 9  |
| L220 | CA   | 13C | 57.243  | 0.059 | 2  |
| L220 | CB   | 13C | 39.488  | 0.000 | 1  |
| L220 | CO-1 | 13C | 178.168 | 0.000 | 1  |
| L220 | H    | 1H  | 6.954   | 0.006 | 15 |
| L220 | N    | 15N | 116.961 | 0.115 | 10 |
| Y221 | CA   | 13C | 60.773  | 0.043 | 2  |
| Y221 | CB   | 13C | 39.514  | 0.050 | 2  |
| Y221 | CO-1 | 13C | 177.442 | 0.000 | 1  |
| Y221 | H    | 1H  | 7.186   | 0.007 | 13 |

|      |      |     |         |       |    |
|------|------|-----|---------|-------|----|
| Y221 | N    | 15N | 119.531 | 0.062 | 9  |
| A222 | CA   | 13C | 55.926  | 0.047 | 2  |
| A222 | CB   | 13C | 18.320  | 0.000 | 2  |
| A222 | CO-1 | 13C | 177.761 | 0.000 | 1  |
| A222 | H    | 1H  | 7.275   | 0.012 | 11 |
| A222 | N    | 15N | 120.461 | 0.047 | 9  |
| L223 | CA   | 13C | 58.037  | 0.015 | 2  |
| L223 | CB   | 13C | 41.233  | 0.093 | 2  |
| L223 | CO-1 | 13C | 180.790 | 0.000 | 1  |
| L223 | H    | 1H  | 8.018   | 0.008 | 11 |
| L223 | N    | 15N | 116.281 | 0.069 | 9  |
| G224 | C    | 13C | 179.441 | 0.000 | 0  |
| G224 | CA   | 13C | 48.397  | 0.154 | 4  |
| G224 | CO-1 | 13C | 179.441 | 0.000 | 1  |
| G224 | H    | 1H  | 7.785   | 0.007 | 15 |
| G224 | N    | 15N | 106.776 | 0.127 | 12 |
| L225 | CA   | 13C | 57.719  | 0.000 | 1  |
| L225 | CB   | 13C | 41.697  | 0.000 | 1  |
| L225 | CO-1 | 13C | 174.082 | 0.000 | 1  |
| L225 | H    | 1H  | 7.364   | 0.004 | 12 |
| L225 | N    | 15N | 122.307 | 0.102 | 9  |
| I226 | CA   | 13C | 65.530  | 0.000 | 1  |
| I226 | CA-1 | 13C | 57.629  | 0.000 | 1  |
| I226 | CB   | 13C | 38.373  | 0.000 | 1  |
| I226 | CB-1 | 13C | 41.696  | 0.000 | 1  |
| I226 | CO-1 | 13C | 179.060 | 0.000 | 1  |
| I226 | H    | 1H  | 8.399   | 0.010 | 11 |
| I226 | N    | 15N | 118.854 | 0.086 | 8  |
| L227 | CA   | 13C | 57.841  | 0.000 | 1  |
| L227 | CA-1 | 13C | 65.524  | 0.000 | 1  |
| L227 | CB   | 13C | 38.976  | 0.000 | 1  |
| L227 | CO-1 | 13C | 177.938 | 0.000 | 1  |
| L227 | H    | 1H  | 8.462   | 0.006 | 9  |
| L227 | N    | 15N | 121.079 | 0.136 | 7  |
| A228 | CA   | 13C | 55.399  | 0.000 | 1  |
| A228 | CA-1 | 13C | 57.729  | 0.000 | 1  |
| A228 | CB   | 13C | 18.760  | 0.000 | 1  |
| A228 | CB-1 | 13C | 38.757  | 0.000 | 1  |
| A228 | CO-1 | 13C | 177.916 | 0.000 | 1  |
| A228 | H    | 1H  | 7.756   | 0.008 | 10 |
| A228 | N    | 15N | 119.463 | 0.069 | 8  |
| E229 | CA   | 13C | 59.094  | 0.000 | 1  |
| E229 | CA-1 | 13C | 55.345  | 0.000 | 1  |
| E229 | CB   | 13C | 30.252  | 0.000 | 1  |
| E229 | CB-1 | 13C | 18.695  | 0.000 | 1  |
| E229 | CO-1 | 13C | 179.240 | 0.000 | 1  |
| E229 | H    | 1H  | 8.086   | 0.006 | 11 |
| E229 | N    | 15N | 116.993 | 0.100 | 8  |
| L230 | CA   | 13C | 57.567  | 0.000 | 1  |
| L230 | CA-1 | 13C | 59.311  | 0.000 | 1  |
| L230 | CB   | 13C | 41.674  | 0.000 | 1  |
| L230 | CB-1 | 13C | 30.319  | 0.000 | 1  |
| L230 | CO-1 | 13C | 179.763 | 0.000 | 1  |
| L230 | H    | 1H  | 8.624   | 0.012 | 14 |
| L230 | N    | 15N | 118.505 | 0.057 | 10 |
| L231 | CA   | 13C | 55.120  | 0.000 | 1  |
| L231 | CA-1 | 13C | 57.564  | 0.000 | 1  |
| L231 | CB   | 13C | 42.714  | 0.000 | 1  |
| L231 | CB-1 | 13C | 41.194  | 0.000 | 1  |
| L231 | CO-1 | 13C | 178.964 | 0.000 | 1  |
| L231 | H    | 1H  | 7.896   | 0.005 | 13 |
| L231 | N    | 15N | 116.241 | 0.118 | 10 |
| H232 | CA   | 13C | 55.505  | 0.000 | 1  |
| H232 | CA-1 | 13C | 55.233  | 0.000 | 1  |

|      |      |     |         |       |    |
|------|------|-----|---------|-------|----|
| H232 | CB   | 13C | 30.388  | 0.000 | 1  |
| H232 | CB-1 | 13C | 42.370  | 0.000 | 1  |
| H232 | CO-1 | 13C | 176.372 | 0.000 | 1  |
| H232 | H    | 1H  | 7.532   | 0.011 | 12 |
| H232 | N    | 15N | 118.867 | 0.104 | 9  |
| V233 | CB   | 13C | 31.578  | 0.000 | 1  |
| V233 | CB-1 | 13C | 30.315  | 0.000 | 1  |
| V233 | CO-1 | 13C | 172.275 | 0.000 | 1  |
| V233 | H    | 1H  | 7.855   | 0.012 | 4  |
| V233 | N    | 15N | 126.507 | 0.028 | 4  |
| C234 | CA   | 13C | 57.986  | 0.000 | 1  |
| C234 | CA-1 | 13C | 62.815  | 0.000 | 1  |
| C234 | CB   | 13C | 29.159  | 0.000 | 1  |
| C234 | CO-1 | 13C | 176.028 | 0.000 | 1  |
| C234 | H    | 1H  | 8.007   | 0.006 | 7  |
| C234 | N    | 15N | 125.660 | 0.106 | 6  |
| K242 | C    | 13C | 177.457 | 0.000 | 0  |
| K242 | CA   | 13C | 59.060  | 0.000 | 1  |
| K242 | CA-1 | 13C | 62.094  | 0.000 | 1  |
| K242 | CB   | 13C | 31.823  | 0.000 | 1  |
| K242 | CO-1 | 13C | 177.457 | 0.000 | 1  |
| K242 | H    | 1H  | 7.627   | 0.005 | 13 |
| K242 | N    | 15N | 124.550 | 0.113 | 9  |
| F243 | CA   | 13C | 59.696  | 0.000 | 1  |
| F243 | CA-1 | 13C | 58.859  | 0.000 | 1  |
| F243 | CB   | 13C | 39.541  | 0.076 | 2  |
| F243 | CB-1 | 13C | 31.983  | 0.000 | 1  |
| F243 | CO-1 | 13C | 176.563 | 0.000 | 1  |
| F243 | H    | 1H  | 8.162   | 0.015 | 10 |
| F243 | N    | 15N | 121.639 | 0.150 | 8  |
| F244 | C    | 13C | 177.710 | 0.000 | 0  |
| F244 | CA   | 13C | 62.427  | 0.186 | 2  |
| F244 | CB   | 13C | 38.924  | 0.028 | 2  |
| F244 | CO-1 | 13C | 177.710 | 0.000 | 1  |
| F244 | H    | 1H  | 8.338   | 0.009 | 14 |
| F244 | N    | 15N | 117.478 | 0.190 | 10 |
| T245 | C    | 13C | 178.656 | 0.000 | 0  |
| T245 | CA   | 13C | 66.665  | 0.000 | 1  |
| T245 | CB   | 13C | 68.484  | 0.000 | 1  |
| T245 | CO-1 | 13C | 178.656 | 0.000 | 1  |
| T245 | H    | 1H  | 7.982   | 0.007 | 10 |
| T245 | N    | 15N | 118.003 | 0.064 | 8  |
| D246 | CA   | 13C | 57.932  | 0.000 | 1  |
| D246 | CA-1 | 13C | 67.136  | 0.000 | 1  |
| D246 | CB   | 13C | 38.430  | 0.000 | 1  |
| D246 | CB-1 | 13C | 68.646  | 0.000 | 1  |
| D246 | CO-1 | 13C | 176.723 | 0.000 | 1  |
| D246 | H    | 1H  | 7.879   | 0.017 | 9  |
| D246 | N    | 15N | 122.846 | 0.272 | 8  |
| R248 | CA   | 13C | 58.626  | 0.000 | 1  |
| R248 | CA-1 | 13C | 58.009  | 0.000 | 1  |
| R248 | CB   | 13C | 29.560  | 0.000 | 1  |
| R248 | CO-1 | 13C | 181.479 | 0.000 | 1  |
| R248 | H    | 1H  | 7.997   | 0.005 | 10 |
| R248 | N    | 15N | 118.547 | 0.132 | 8  |
| D249 | CA   | 13C | 54.323  | 0.000 | 1  |
| D249 | CA-1 | 13C | 58.776  | 0.000 | 1  |
| D249 | CB   | 13C | 41.666  | 0.000 | 1  |
| D249 | CB-1 | 13C | 29.581  | 0.000 | 1  |
| D249 | CO-1 | 13C | 178.068 | 0.000 | 1  |
| D249 | H    | 1H  | 7.571   | 0.004 | 13 |
| D249 | N    | 15N | 120.049 | 0.090 | 10 |
| G250 | CA   | 13C | 45.692  | 0.086 | 2  |
| G250 | CA-1 | 13C | 54.245  | 0.000 | 1  |

|      |      |     |         |       |    |
|------|------|-----|---------|-------|----|
| G250 | CB-1 | 13C | 41.535  | 0.000 | 1  |
| G250 | CO-1 | 13C | 176.961 | 0.000 | 1  |
| G250 | H    | 1H  | 7.833   | 0.007 | 12 |
| G250 | N    | 15N | 109.440 | 0.072 | 8  |
| I251 | CA   | 13C | 60.774  | 0.000 | 1  |
| I251 | CA-1 | 13C | 45.922  | 0.065 | 2  |
| I251 | CB   | 13C | 36.971  | 0.000 | 1  |
| I251 | CO-1 | 13C | 174.202 | 0.000 | 1  |
| I251 | H    | 1H  | 8.198   | 0.006 | 12 |
| I251 | N    | 15N | 124.669 | 0.097 | 9  |
| I252 | CA   | 13C | 59.535  | 0.000 | 1  |
| I252 | CA-1 | 13C | 60.779  | 0.000 | 1  |
| I252 | CB   | 13C | 37.028  | 0.000 | 1  |
| I252 | CB-1 | 13C | 36.866  | 0.000 | 1  |
| I252 | CO-1 | 13C | 174.279 | 0.000 | 1  |
| I252 | H    | 1H  | 8.091   | 0.012 | 11 |
| I252 | N    | 15N | 128.693 | 0.103 | 9  |
| S253 | CA   | 13C | 58.536  | 0.000 | 1  |
| S253 | CA-1 | 13C | 59.379  | 0.000 | 1  |
| S253 | CB   | 13C | 63.979  | 0.000 | 1  |
| S253 | CB-1 | 13C | 36.817  | 0.000 | 1  |
| S253 | CO-1 | 13C | 176.096 | 0.000 | 1  |
| S253 | H    | 1H  | 8.464   | 0.022 | 10 |
| S253 | N    | 15N | 122.978 | 0.062 | 8  |
| D254 | CA   | 13C | 55.740  | 0.000 | 1  |
| D254 | CA-1 | 13C | 58.637  | 0.000 | 1  |
| D254 | CB   | 13C | 39.978  | 0.000 | 1  |
| D254 | CB-1 | 13C | 63.974  | 0.000 | 1  |
| D254 | H    | 1H  | 8.132   | 0.006 | 10 |
| D254 | N    | 15N | 120.468 | 0.074 | 7  |
| I255 | CA   | 13C | 62.610  | 0.000 | 1  |
| I255 | CA-1 | 13C | 55.778  | 0.000 | 1  |
| I255 | CB   | 13C | 37.171  | 0.000 | 1  |
| I255 | CB-1 | 13C | 39.996  | 0.000 | 1  |
| I255 | CO-1 | 13C | 176.558 | 0.000 | 1  |
| I255 | H    | 1H  | 7.291   | 0.011 | 12 |
| I255 | N    | 15N | 116.515 | 0.137 | 9  |
| F256 | CA   | 13C | 57.291  | 0.000 | 1  |
| F256 | CA-1 | 13C | 62.672  | 0.000 | 1  |
| F256 | CB   | 13C | 39.526  | 0.000 | 1  |
| F256 | CB-1 | 13C | 37.070  | 0.000 | 1  |
| F256 | CO-1 | 13C | 176.728 | 0.000 | 1  |
| F256 | H    | 1H  | 7.203   | 0.005 | 12 |
| F256 | N    | 15N | 121.089 | 0.116 | 10 |
| D257 | CA   | 13C | 53.252  | 0.000 | 1  |
| D257 | CA-1 | 13C | 57.429  | 0.000 | 1  |
| D257 | CB   | 13C | 41.183  | 0.000 | 1  |
| D257 | CB-1 | 13C | 39.496  | 0.000 | 1  |
| D257 | CO-1 | 13C | 175.630 | 0.000 | 1  |
| D257 | H    | 1H  | 8.429   | 0.003 | 8  |
| D257 | N    | 15N | 123.071 | 0.132 | 7  |
| K258 | CA   | 13C | 60.690  | 0.000 | 1  |
| K258 | CA-1 | 13C | 53.196  | 0.000 | 1  |
| K258 | CB   | 13C | 31.836  | 0.000 | 1  |
| K258 | CB-1 | 13C | 41.106  | 0.000 | 1  |
| K258 | CO-1 | 13C | 176.883 | 0.000 | 1  |
| K258 | H    | 1H  | 8.271   | 0.009 | 6  |
| K258 | N    | 15N | 121.340 | 0.036 | 6  |
| K259 | CA   | 13C | 59.237  | 0.000 | 0  |
| K259 | CB   | 13C | 30.247  | 0.000 | 0  |
| K259 | H    | 1H  | 8.185   | 0.000 | 0  |
| K259 | N    | 15N | 121.225 | 0.000 | 0  |
| E260 | CA   | 13C | 58.903  | 0.052 | 2  |
| E260 | CA-1 | 13C | 59.237  | 0.000 | 1  |



|      |      |     |         |       |    |
|------|------|-----|---------|-------|----|
| E260 | CB   | 13C | 28.566  | 0.000 | 2  |
| E260 | CB-1 | 13C | 30.247  | 0.000 | 1  |
| E260 | CO-1 | 13C | 179.546 | 0.000 | 1  |
| E260 | H    | 1H  | 7.708   | 0.020 | 11 |
| E260 | N    | 15N | 122.917 | 0.226 | 9  |
| K261 | CA   | 13C | 60.266  | 0.043 | 2  |
| K261 | CB   | 13C | 32.345  | 0.005 | 2  |
| K261 | CO-1 | 13C | 178.533 | 0.000 | 1  |
| K261 | H    | 1H  | 8.716   | 0.014 | 13 |
| K261 | N    | 15N | 119.418 | 0.095 | 10 |
| T262 | CA   | 13C | 66.468  | 0.116 | 2  |
| T262 | CB   | 13C | 68.929  | 0.038 | 2  |
| T262 | CO-1 | 13C | 178.328 | 0.000 | 1  |
| T262 | H    | 1H  | 7.861   | 0.008 | 14 |
| T262 | N    | 15N | 113.894 | 0.105 | 10 |
| L263 | C    | 13C | 176.335 | 0.000 | 0  |
| L263 | CA   | 13C | 57.900  | 0.030 | 2  |
| L263 | CB   | 13C | 41.379  | 0.000 | 1  |
| L263 | CO-1 | 13C | 176.335 | 0.000 | 1  |
| L263 | H    | 1H  | 6.973   | 0.005 | 13 |
| L263 | N    | 15N | 121.143 | 0.099 | 10 |
| L264 | CA   | 13C | 58.549  | 0.084 | 2  |
| L264 | CB   | 13C | 42.194  | 0.000 | 1  |
| L264 | CB-1 | 13C | 41.439  | 0.000 | 1  |
| L264 | CO-1 | 13C | 178.936 | 0.000 | 1  |
| L264 | H    | 1H  | 8.391   | 0.010 | 14 |
| L264 | N    | 15N | 119.567 | 0.139 | 10 |
| Q265 | CA   | 13C | 58.708  | 0.002 | 2  |
| Q265 | CB   | 13C | 28.537  | 0.016 | 2  |
| Q265 | CB-1 | 13C | 42.138  | 0.000 | 1  |
| Q265 | CO-1 | 13C | 178.253 | 0.000 | 1  |
| Q265 | H    | 1H  | 8.456   | 0.006 | 14 |
| Q265 | N    | 15N | 115.810 | 0.091 | 10 |
| K266 | CA   | 13C | 58.413  | 0.075 | 2  |
| K266 | CB   | 13C | 32.360  | 0.031 | 2  |
| K266 | CO-1 | 13C | 178.726 | 0.000 | 1  |
| K266 | H    | 1H  | 6.954   | 0.005 | 12 |
| K266 | N    | 15N | 116.424 | 0.122 | 9  |
| L267 | CA   | 13C | 58.611  | 0.015 | 2  |
| L267 | CB   | 13C | 42.270  | 0.077 | 2  |
| L267 | CO-1 | 13C | 179.450 | 0.000 | 1  |
| L267 | H    | 1H  | 8.144   | 0.007 | 16 |
| L267 | N    | 15N | 119.801 | 0.054 | 11 |
| L268 | CA   | 13C | 52.927  | 0.124 | 2  |
| L268 | CB   | 13C | 38.980  | 0.035 | 2  |
| L268 | CO-1 | 13C | 176.046 | 0.000 | 1  |
| L268 | H    | 1H  | 7.450   | 0.007 | 13 |
| L268 | N    | 15N | 110.532 | 0.088 | 10 |
| S269 | C    | 13C | 177.571 | 0.000 | 0  |
| S269 | CA   | 13C | 58.773  | 0.000 | 1  |
| S269 | CB   | 13C | 64.007  | 0.000 | 1  |
| S269 | CO-1 | 13C | 177.571 | 0.000 | 1  |
| S269 | H    | 1H  | 7.009   | 0.005 | 12 |
| S269 | N    | 15N | 115.222 | 0.114 | 9  |
| K270 | C    | 13C | 176.779 | 0.000 | 0  |
| K270 | CA   | 13C | 58.530  | 0.000 | 1  |
| K270 | CA-1 | 13C | 58.848  | 0.000 | 1  |
| K270 | CB   | 13C | 31.928  | 0.000 | 1  |
| K270 | CB-1 | 13C | 63.986  | 0.000 | 1  |
| K270 | CO-1 | 13C | 176.779 | 0.000 | 1  |
| K270 | H    | 1H  | 8.816   | 0.008 | 10 |
| K270 | N    | 15N | 126.746 | 0.122 | 8  |
| K271 | C    | 13C | 176.894 | 0.000 | 0  |
| K271 | CA   | 13C | 53.294  | 0.000 | 1  |

|      |      |     |         |       |    |
|------|------|-----|---------|-------|----|
| K271 | CA-1 | 13C | 58.598  | 0.000 | 1  |
| K271 | CB   | 13C | 31.123  | 0.000 | 1  |
| K271 | CB-1 | 13C | 31.951  | 0.000 | 1  |
| K271 | CO-1 | 13C | 176.894 | 0.000 | 1  |
| K271 | H    | 1H  | 8.349   | 0.006 | 12 |
| K271 | N    | 15N | 122.310 | 0.104 | 9  |
| E273 | CA   | 13C | 58.380  | 0.000 | 1  |
| E273 | CA-1 | 13C | 65.400  | 0.000 | 1  |
| E273 | CB   | 13C | 27.876  | 0.000 | 1  |
| E273 | CB-1 | 13C | 31.836  | 0.000 | 1  |
| E273 | CO-1 | 13C | 178.855 | 0.000 | 1  |
| E273 | H    | 1H  | 9.519   | 0.010 | 12 |
| E273 | N    | 15N | 115.911 | 0.043 | 9  |
| D274 | CA   | 13C | 54.966  | 0.000 | 1  |
| D274 | CA-1 | 13C | 58.498  | 0.000 | 1  |
| D274 | CB   | 13C | 41.619  | 0.000 | 1  |
| D274 | CB-1 | 13C | 28.000  | 0.000 | 1  |
| D274 | CO-1 | 13C | 177.283 | 0.000 | 1  |
| D274 | H    | 1H  | 7.592   | 0.006 | 12 |
| D274 | N    | 15N | 120.545 | 0.108 | 9  |
| R275 | CA   | 13C | 54.136  | 0.000 | 1  |
| R275 | CA-1 | 13C | 55.004  | 0.000 | 1  |
| R275 | CB   | 13C | 30.048  | 0.000 | 1  |
| R275 | CB-1 | 13C | 41.671  | 0.000 | 1  |
| R275 | CO-1 | 13C | 177.208 | 0.000 | 1  |
| R275 | H    | 1H  | 7.280   | 0.007 | 12 |
| R275 | N    | 15N | 120.552 | 0.087 | 9  |
| N277 | CA   | 13C | 51.900  | 0.000 | 1  |
| N277 | CA-1 | 13C | 62.293  | 0.000 | 1  |
| N277 | CB   | 13C | 38.354  | 0.000 | 1  |
| N277 | CB-1 | 13C | 31.389  | 0.000 | 1  |
| N277 | CO-1 | 13C | 174.216 | 0.000 | 1  |
| N277 | H    | 1H  | 7.914   | 0.006 | 9  |
| N277 | N    | 15N | 115.044 | 0.066 | 8  |
| T278 | CA-1 | 13C | 51.752  | 0.000 | 1  |
| T278 | CB-1 | 13C | 38.285  | 0.000 | 1  |
| T278 | CO-1 | 13C | 176.646 | 0.000 | 1  |
| T278 | H    | 1H  | 8.223   | 0.010 | 10 |
| T278 | N    | 15N | 108.844 | 0.111 | 7  |
| S279 | CA   | 13C | 62.010  | 0.093 | 2  |
| S279 | CO-1 | 13C | 177.382 | 0.000 | 1  |
| S279 | H    | 1H  | 7.931   | 0.005 | 11 |
| S279 | N    | 15N | 117.887 | 0.075 | 8  |
| E280 | CA   | 13C | 58.503  | 0.000 | 1  |
| E280 | CA-1 | 13C | 61.977  | 0.000 | 1  |
| E280 | CB   | 13C | 28.605  | 0.008 | 2  |
| E280 | CB-1 | 13C | 62.001  | 0.000 | 1  |
| E280 | CO-1 | 13C | 177.678 | 0.000 | 1  |
| E280 | H    | 1H  | 7.699   | 0.008 | 14 |
| E280 | N    | 15N | 124.333 | 0.076 | 10 |
| I281 | CA   | 13C | 66.247  | 0.000 | 1  |
| I281 | CA-1 | 13C | 58.586  | 0.000 | 1  |
| I281 | CB   | 13C | 38.097  | 0.000 | 1  |
| I281 | CO-1 | 13C | 180.348 | 0.000 | 1  |
| I281 | H    | 1H  | 8.474   | 0.009 | 11 |
| I281 | N    | 15N | 123.499 | 0.156 | 8  |
| L285 | CA   | 13C | 57.658  | 0.000 | 1  |
| L285 | CA-1 | 13C | 67.050  | 0.000 | 1  |
| L285 | CB   | 13C | 40.580  | 0.000 | 1  |
| L285 | CB-1 | 13C | 68.427  | 0.000 | 1  |
| L285 | CO-1 | 13C | 174.851 | 0.000 | 1  |
| L285 | H    | 1H  | 8.086   | 0.010 | 9  |
| L285 | N    | 15N | 119.457 | 0.088 | 7  |
| T286 | CA   | 13C | 67.112  | 0.000 | 2  |

|      |      |     |         |       |    |
|------|------|-----|---------|-------|----|
| T286 | CA-1 | 13C | 57.418  | 0.000 | 1  |
| T286 | CB   | 13C | 68.643  | 0.145 | 2  |
| T286 | CB-1 | 13C | 40.612  | 0.000 | 1  |
| T286 | CO-1 | 13C | 180.477 | 0.000 | 1  |
| T286 | H    | 1H  | 7.594   | 0.003 | 13 |
| T286 | N    | 15N | 115.687 | 0.166 | 10 |
| V287 | CA   | 13C | 66.288  | 0.000 | 1  |
| V287 | CB   | 13C | 30.811  | 0.000 | 1  |
| V287 | CO-1 | 13C | 176.878 | 0.000 | 1  |
| V287 | H    | 1H  | 7.582   | 0.006 | 13 |
| V287 | N    | 15N | 124.267 | 0.138 | 11 |
| W288 | CA   | 13C | 57.870  | 0.000 | 1  |
| W288 | CA-1 | 13C | 66.462  | 0.000 | 1  |
| W288 | CB   | 13C | 29.067  | 0.000 | 1  |
| W288 | CB-1 | 13C | 30.937  | 0.000 | 1  |
| W288 | CO-1 | 13C | 180.054 | 0.000 | 1  |
| W288 | H    | 1H  | 8.384   | 0.008 | 13 |
| W288 | N    | 15N | 121.159 | 0.117 | 8  |
| K289 | C    | 13C | 175.103 | 0.000 | 0  |
| K289 | CA   | 13C | 57.964  | 0.000 | 1  |
| K289 | CA-1 | 13C | 57.829  | 0.000 | 1  |
| K289 | CB   | 13C | 32.798  | 0.000 | 1  |
| K289 | CB-1 | 13C | 29.089  | 0.000 | 1  |
| K289 | CO-1 | 13C | 178.819 | 0.000 | 1  |
| K289 | H    | 1H  | 7.557   | 0.009 | 10 |
| K289 | N    | 15N | 118.227 | 0.052 | 8  |
| K290 | CA   | 13C | 56.567  | 0.000 | 1  |
| K290 | CA-1 | 13C | 57.927  | 0.000 | 1  |
| K290 | CB   | 13C | 32.453  | 0.000 | 1  |
| K290 | CB-1 | 13C | 32.623  | 0.000 | 1  |
| K290 | CO-1 | 13C | 177.710 | 0.000 | 1  |
| K290 | H    | 1H  | 7.630   | 0.008 | 11 |
| K290 | N    | 15N | 120.010 | 0.123 | 9  |
| S291 | CA-1 | 13C | 56.587  | 0.000 | 1  |
| S291 | CB   | 13C | 63.216  | 0.000 | 1  |
| S291 | CB-1 | 13C | 32.381  | 0.000 | 1  |
| S291 | CO-1 | 13C | 177.008 | 0.000 | 1  |
| S291 | H    | 1H  | 8.029   | 0.009 | 7  |
| S291 | N    | 15N | 118.691 | 0.141 | 6  |
| E296 | CA   | 13C | 56.575  | 0.000 | 1  |
| E296 | CA-1 | 13C | 53.211  | 0.000 | 1  |
| E296 | CB   | 13C | 30.135  | 0.000 | 1  |
| E296 | CB-1 | 13C | 38.957  | 0.000 | 1  |
| E296 | CO-1 | 13C | 175.484 | 0.000 | 1  |
| E296 | H    | 1H  | 8.277   | 0.006 | 6  |
| E296 | N    | 15N | 122.489 | 0.081 | 6  |
| R297 | CA   | 13C | 56.290  | 0.000 | 1  |
| R297 | CA-1 | 13C | 56.735  | 0.000 | 1  |
| R297 | CO-1 | 13C | 177.111 | 0.000 | 1  |
| R297 | H    | 1H  | 8.216   | 0.003 | 4  |
| R297 | N    | 15N | 122.988 | 0.070 | 4  |
| H298 | CA   | 13C | 55.938  | 0.000 | 1  |
| H298 | CA-1 | 13C | 56.481  | 0.000 | 1  |
| H298 | CB   | 13C | 30.237  | 0.000 | 1  |
| H298 | CB-1 | 13C | 29.879  | 0.000 | 1  |
| H298 | CO-1 | 13C | 176.644 | 0.000 | 1  |
| H298 | H    | 1H  | 8.209   | 0.002 | 6  |
| H298 | N    | 15N | 122.410 | 0.054 | 6  |
